# Supplementary material for: A combination of polyunsaturated fatty acid, nonribosomal peptide and polyketide biosynthetic machinery is used to assemble the zeamine antibiotics
Source: PubMed Central journal article supplement — Chem Sci. 2014 Oct 15;6(2):923–9. doi: 10.1039/c4sc01927j (PMC5811116; doi:10.1039/c4sc01927j), 2014-10-15
Supplement: SC-006-C4SC01927J-s001.pdf [file SC-006-C4SC01927J-s001.pdf]

## ELECTRONIC SUPPLEMENTARY INFORMATION

### A COMBINATION OF POLYUNSATURATED FATTY ACID, NONRIBOSOMAL PEPTIDE AND POLYKETIDE BIOSYNTHETIC MACHINERY IS USED TO ASSEMBLE THE ZEAMINE ANTIBIOTICS

Joleen Masschelein<sup>a,b</sup>, Charlien Clauwers<sup>a,b</sup>, Ufedo R. Awodi<sup>c</sup>, Karen Stalmans<sup>a</sup>, Wesley Vermaelen<sup>a</sup>,  
Eveline Lescrinier<sup>d</sup>, Abram Aertsen<sup>b</sup>, Chris Michiels<sup>b</sup>, Gregory L. Challis<sup>c,\*</sup>, Rob Lavigne<sup>a,\*</sup>

<sup>a</sup> Laboratory of Gene Technology, KU Leuven, Kasteelpark Arenberg 21 - box 2462, B-3001 Heverlee,  
Belgium

<sup>b</sup> Laboratory of Food Microbiology, KU Leuven, Kasteelpark Arenberg 22, B-3001 Heverlee, Belgium

<sup>c</sup> Department of Chemistry, University of Warwick, Coventry CV4 7AL, UK

<sup>d</sup> Laboratory of Medicinal Chemistry, Rega Institute for Medical Research, KU Leuven,  
Minderbroedersstraat 10, B-3000 Leuven, Belgium

\* Corresponding authors:

Professor GL Challis. Department of Chemistry, University of Warwick, Coventry CV4 7AL, UK. E-mail:  
g.l.challis@warwick.ac.uk; Fax: +44 (0)2476 524112; Tel: +44 (0)2476 574024

Professor R Lavigne. Division of Gene Technology, KU Leuven, Kasteelpark Arenberg 21 - box 2462, B-  
3001 Heverlee, Belgium. E-mail: rob.lavigne@biw.kuleuven.be; Fax: +32 (0)16 32 19 65; Tel: +32 (0)16 37  
95 24

## EXPERIMENTAL SECTION

### Bacterial strains, plasmids and culture conditions

*Serratia plymuthica* RVH1 served as the wild type zeamine producer<sup>1</sup> whereas the RVH1 $\Delta$ zmn22 and the RVH1 $\Delta$ zmn18 mutants were used for production and isolation of the prezeamines and zeamine II respectively. *Escherichia coli* S17-1 was used for conjugative transfer of DNA to *S. plymuthica* RVH1. The commercially available *E. coli* TOP10 and *E. coli* BL21 (DE3) pLysS (Life Technologies) were used for routine cloning purposes and protein expression respectively. *Staphylococcus aureus* ATCC27661 and *Escherichia coli* MG1655 were used in antimicrobial activity assays. Plasmids and bacterial strains used or constructed during this work are listed in Table S6.

*S. plymuthica* RVH1 was grown at 30°C in Lysogeny Broth (LB) for liquid cultivation and on LB agar (LB broth supplemented with 1.5% w/v agar) for solid cultivation. *E. coli* and *S. aureus* strains were grown at 37°C in LB broth and on LB-agar. When appropriate, media were supplemented with antibiotics at the following concentrations: kanamycin (50 µg/ml), ampicillin (100 µg/ml), carbenicillin (50 µg/ml).

### Gene deletion and complementation in *S. plymuthica* RVH1

In-frame deletion of target genes in *Serratia plymuthica* RVH1 was accomplished via double homologous recombination. The chromosomal fragments (approx. 500 bp) that flank the genes were amplified and cloned into the suicide vector pSF100<sup>2</sup> and introduced into *E. coli* S17-1  $\lambda$ -pir by electroporation. The construct was transferred from *E. coli* S17-1  $\lambda$ -pir to *Serratia plymuthica* RVH1 via biparental mating. More specifically, late exponential cultures of both strains (0.5 ml) were mixed on a 0.45 µm filter and placed on an LB agar plate for overnight incubation at 30°C. The mixture was resuspended in 1 ml of sterile saline solution and spread on LB agar plates supplemented with kanamycin. Subsequent overnight incubation at 16°C allowed the selective growth of *Serratia* clones carrying the suicide plasmid while restricting *E. coli* growth. To select for vector excision, co-integrant clones were replica plated on LB agar plates and LB agar plates supplemented with kanamycin. Knock-out mutagenesis was confirmed by PCR and sequencing.

Genetic complementations were made by amplifying the ORF of interest by PCR and cloning it into the pTrc99A expression vector under the control of a trc promoter.<sup>3</sup> The resulting construct was introduced via electroporation to the corresponding *S. plymuthica* RVH1 deletion mutant. Transformants were selected on LB agar plates supplemented with carbenicillin.

For an overview of all gene deletion and complementation experiments, see table S1.

### Antibacterial activity assays

Minimal inhibitory concentrations (MIC) of purified zeamine compounds were determined by the broth microdilution method (National Committee for Clinical Laboratory Standards, document M7-A5). In a 96-well microtiter plate, 50 µl of serial twofold dilutions of the antibiotics in LB broth were mixed with 50 µl of bacterial suspension (10<sup>6</sup> CFU/ml in LB broth). After 18h incubation at 37°C, MICs were defined as the lowest concentrations that visibly inhibited bacterial growth.

The antimicrobial activity of knockout mutants and complementation strains was monitored by plate lawn assays. An LB agar plate was overlaid with a lawn of stationary phase *S. aureus* ATCC27661 cells, diluted to OD<sub>600nm</sub> = 0,03. 10 µl samples of stationary phase test strains were spotted on top of the lawn. After incubation for 48h at 16°C and 24h at 30°C, the size of the inhibition zones was measured. Complementation strains were grown to stationary phase in LB medium supplemented with carbenicillin to maintain the plasmid. Prior to spotting, the cells were washed with LB-medium to remove traces of the antibiotic. IPTG (0 – 0.1 – 0.5 mM) was added to the agar plates to induce expression.

### LC-MS analysis of zeamine production

Supernatant from 50 mL cultures of wild type *S. plymuthica* RVH1 and deletion mutants grown in minimal medium were analyzed by ultra-high resolution LC-MS using a Dionex UltiMate 3000 UHPLC connected to a Zorbax Eclipse Plus column (C<sub>18</sub>, 100 × 2.1 mm, 1.8 μm) coupled to a Bruker MaXis IMPACT ESI-QTOF mass spectrometer. Mobile phases consisted of water (A) and acetonitrile (B), each supplemented with 0.1% formic acid. A gradient of 5% B to 100% B in 20 minutes was employed at a flow rate of 0.1 mL/min. The mass spectrometer was operated in positive ion mode with a scan range of 50–3000 m/z. Source conditions were: end plate offset at –500 V; capillary at –4500 V; nebulizer gas (N<sub>2</sub>) at 1.6 bar; dry gas (N<sub>2</sub>) at 8 L min<sup>-1</sup>; dry temperature at 180 °C. Ion transfer conditions were: ion funnel RF at 200 Vpp; multiple RF at 200 Vpp; quadrupole low mass at 55 m/z; collision energy at 5.0 eV; collision RF at 600 Vpp; ion cooler RF at 50–350 Vpp; transfer time at 121 μs; pre-pulse storage time at 1 μs. Calibration was performed with 10 mM sodium formate through a loop injection of 20 μL at the start of each run.

### Purification of zeamine, zeamine I and zeamine II

For production and purification of zeamine and zeamine I, *Serratia plymuthica* RVH1 was grown in minimal medium<sup>4</sup> (10.5 g/l K<sub>2</sub>HPO<sub>4</sub>, 4.5 g/l KH<sub>2</sub>PO<sub>4</sub>, 2 g/l (NH<sub>4</sub>)<sub>2</sub>SO<sub>4</sub>, 2 g/l mannitol, 0.2 g/l MgSO<sub>4</sub>·7H<sub>2</sub>O, 5 mg/l FeSO<sub>4</sub>, 10 mg/l CaCl<sub>2</sub> and 2 mg/l MnCl<sub>2</sub>; pH 7.0) supplemented with 5 μM synthetic N-(3-oxo-hexanoyl)-C<sub>6</sub>-homoserine lactone (Sigma) at 16°C for 72 hours on a rotary shaker (80 rpm). Cells were removed by centrifugation (4600g, 45 min), after which the supernatant was adjusted to pH 10.0 with 10M NaOH and extracted (1:1) with n-butanol twice. The extract was concentrated *in vacuo* and the resulting residue was redissolved in MeOH-CH<sub>2</sub>Cl<sub>2</sub> (1-8). This solution was acidified (pH 3) with formic acid and subjected to silica gel column chromatography as described previously<sup>5</sup>. Zeamine and zeamine I eluted with a slightly increased retention time compared to zeamine II. Fractions of interest were pooled and dried by rotary evaporation *in vacuo* and lyophilization. Residual NaCl was removed by redissolving the solids in CHCl<sub>3</sub> and extracting (1:1) the resulting solution with 1% NaOH. The organic phase was then dried over MgSO<sub>4</sub>, filtered and concentrated to dryness *in vacuo* to give the purified zeamines as a colourless solid.

For purification of zeamine II, *Serratia plymuthica* RVH1Δ*zmn18* was used as the producing strain. Fermentation conditions and extraction procedures were identical to those employed for the isolation of zeamine and zeamine I. The extract was dried by rotary evaporation *in vacuo* and lyophilization. Solids were dissolved in MeOH supplemented with 5% triethylamine, mixed with three times the amount of silica and allowed to dry overnight. The silica powder was then added to the top of a silica column and washed sequentially with MeOH-CH<sub>2</sub>Cl<sub>2</sub> (1-8), MeOH-CH<sub>2</sub>Cl<sub>2</sub> (1-4), MeOH-CH<sub>2</sub>Cl<sub>2</sub> (1-2), MeOH-CH<sub>2</sub>Cl<sub>2</sub> (1-1) and 100% MeOH. Zeamine II eluted when 1% formic acid was added to the MeOH solvent.

### Purification and structure elucidation of the prezeamines

*Serratia plymuthica* RVH1 Δ*zmn22* was grown in minimal medium<sup>4</sup> (10.5 g/l K<sub>2</sub>HPO<sub>4</sub>, 4.5 g/l KH<sub>2</sub>PO<sub>4</sub>, 2 g/l (NH<sub>4</sub>)<sub>2</sub>SO<sub>4</sub>, 2 g/l mannitol, 0.2 g/l MgSO<sub>4</sub>·7H<sub>2</sub>O, 5 mg/l FeSO<sub>4</sub>, 10 mg/l CaCl<sub>2</sub> and 2 mg/l MnCl<sub>2</sub>; pH 7.0) supplemented with 5 μM synthetic N-(3-oxo-hexanoyl)-C<sub>6</sub>-homoserine lactone (Sigma) at 16°C for 72 hours on a rotary shaker (80 rpm). Cells were pelleted by centrifugation (4600 rpm, 45 min, 4°C) and the culture supernatant was added to Diaion HP-20 resin (20 g/L, Sigma). The resin was washed sequentially with 10%, 30%, 50% and 100% acetonitrile (MeCN) in water. The prezeamines eluted with 30% MeCN as detected by LC-MS. This solution was dried by rotary evaporation *in vacuo* and subsequent lyophilization. Solids were washed with MeOH and finally dissolved in H<sub>2</sub>O.

High resolution LC-ESI-MS/MS analysis was performed with a Dionex UHPLC Ultimate 3000 equipped with a Dionex Acclaim Pepmap 100 column (C<sub>18</sub>, 75 μm x 15 cm, 3 μm, 100 Å) coupled to a Q Exactive Hybrid Quadrupole Orbitrap mass spectrometer. Mobile phases consisted of water (A) and 80% acetonitrile (B), each

supplemented with 0.1% formic acid. Samples were eluted at a flow rate of 0.300  $\mu\text{L}/\text{min}$  using a gradient of 4% to 65% B in 40 min. The mass spectrometer was operated in nano-online positive ion mode using the following parameters: scan range: 200-1600  $m/z$ , nanospray voltage: 2.2kV, source temperature: 180°C, normalized collision energy: 30 eV, isolation window:  $\pm 3$  Da. ProteoMAss LTQ/FT-Hybrid ESI Pos. Mode CalMix (MSCAL5-1EA SUPELCO, Sigma-Aldrich) was used as an external calibrant and the lock mass 445.12003 as an internal calibrant. The Thermo Raw files were converted to mzXML format using MassMatrix v3.9 and further analyzed with MZmine 2.

For NMR analysis, the sample was prepared by dissolving 10 mg prezeamine (**4**) in 600  $\mu\text{L}$   $\text{D}_2\text{O}$ . All spectra were recorded at 288 K using a 5 mm TCI HCN Z gradient cryoprobe on a Bruker Avance II 600 operating at a proton frequency of 600.13 MHz and  $^{13}\text{C}$ -frequency of 150.92 MHz. The Bruker Topspin 2.1 software was used to process the spectra. The signal of residual solvent was suppressed by presaturation in the 1D proton spectrum.  $^1\text{H}$ -chemical shifts are referenced to the HOD signal (4.87 ppm) while  $^{13}\text{C}$ -chemical shifts were indirectly referenced using  $\text{SR}_{^{13}\text{C}}=0.25144954*\text{SR}_{^1\text{H}}$  according to IUPAC recommendations.<sup>6</sup> To obtain the assignment of non-exchangeable proton and carbon resonances (listed in table S4) various 2-D techniques were used. HSQC and HSQC-TOCSY spectra were recorded using 64 scans and 1024/1024 complex data points and 100/11 ppm spectral widths in t1 and t2, respectively. The pulse sequence for the 2-D gradient enhanced  $^1\text{H}$ - $^{13}\text{C}$  HSQC was as described by Sattler et al.<sup>7</sup> The delays  $\Delta 1$  and  $\Delta 2$  in the inept transfer were set to 1.67 ms (1/4JCH). The 2-D HSQC-TOCSY consisted of an HSQC building block<sup>8</sup> ( $\Delta 1 = \Delta 2 = 1.67$  ms) followed by a clean MLEV17 TOCSY transfer step<sup>9</sup> during a mixing time of 60 ms prior to detection. Decoupling during the acquisition of the HSQC and HSQC-TOCSY spectra was achieved by using the *garp* sequence.<sup>10</sup> In the HMBC<sup>11</sup> spectrum a delay of 62.5 ms was used to allow long-range couplings to evolve. It was recorded using 64 scans and 1024/1024 complex data points and 200/11 ppm spectral widths in t1 and t2, respectively. Sine-bell shaped gradients were applied along the z-axis during the sequences to obtain coherence selection and sensitivity enhancement. Prior to Fourier transformation, a squared sine-bell function was applied in both dimensions of 2-D spectra.

### Feeding experiments

Overnight cultures of *Serratia plymuthica* RVH1 $\Delta zmn10$ ,  $\Delta zmn11$  and  $\Delta zmn12$  in LB-medium were inoculated 1:1000 in minimal medium (10.5 g/l  $\text{K}_2\text{HPO}_4$ , 4.5 g/l  $\text{KH}_2\text{PO}_4$ , 2 g/l  $(\text{NH}_4)_2\text{SO}_4$ , 2 g/l mannitol, 0.2 g/l  $\text{MgSO}_4 \cdot 7\text{H}_2\text{O}$ , 5 mg/l  $\text{FeSO}_4$ , 10 mg/l  $\text{CaCl}_2$  and 2 mg/l  $\text{MnCl}_2$ ; pH 7.0) and incubated at 16°C on a rotary shaker (80 rpm). After 16h, fermentation cultures were supplemented with 5  $\mu\text{M}$  synthetic N-(3-oxo-hexanoyl)- $\text{C}_6$ -homoserine lactone and 0.9 mM zeamine II (75 mM stock solution in MeOH) and allowed to grow for an additional 72h. Supernatant from these cultures was subsequently analyzed by ultra-high resolution LC-MS as described above.

### Cloning, overexpression and purification of Zmn14

*zmn14* (1233 bp) was amplified from purified genomic DNA of *S. plymuthica* RVH1 with a final extension step to add a single deoxyadenosine to the 3' ends of the PCR product (Pfu polymerase; Fermentas). The purified PCR product was subsequently ligated in linearized pEXP5-CT/TOPO<sup>®</sup> vector with single overhanging 3' deoxythymidine (T) residues using the pEXP5-CT/TOPO<sup>®</sup> TA Expression Kit (Invitrogen). This ligation mixture was used to transform One Shot<sup>®</sup> chemically competent *E. coli* TOP10 cells. Transformants were selected on LB plates supplemented with ampicillin and the correct orientation of the construct was confirmed by sequence analysis (ABI 3130 Sequencer, BigDye chemistry, Applied Biosystems). Correct constructs were used to transform chemically competent *E. coli* BL21 Star<sup>™</sup> (DE3) pLysS cells (Invitrogen) for expression of *zmn14* as a His<sub>6</sub>-tag fusion protein. Recombinant Zmn14 was overproduced overnight at 16°C (180 rpm) after induction of exponentially growing cells ( $\text{OD}_{600\text{nm}} = 0.6$ ) with 0.1 mM isopropyl- $\beta$ -D-thiogalactopyranoside (IPTG) in 500 ml LB-medium. Cells were harvested by centrifugation (3000 rpm, 20 min, 4°C) and cell pellets were resuspended in 10 ml lysis buffer (20 mM  $\text{NaH}_2\text{PO}_4$ , 0.5 M NaCl, 10% glycerol, pH 8.5) Cells were lysed using a high pressure cell disruptor (20000 psi, Constant Systems, LA Biosystems) and the lysate was subsequently centrifuged (11000 rpm, 30 min, 4°C) to remove cellular debris.

Protein purification was carried out on a GE Healthcare Akta Purifier using a HisTrap™ HP 1 ml column (GE Healthcare). After column equilibration with washing buffer (50 mM imidazole, 20 mM NaH<sub>2</sub>PO<sub>4</sub>, 0.5 M NaCl, 10% glycerol, pH 8.5, 2 column volumes) the lysate was loaded and washed with 20 column volumes of washing buffer. The protein was eluted in elution buffer (500 mM imidazole, 20 mM NaH<sub>2</sub>PO<sub>4</sub>, 0.5 M NaCl, 10% glycerol, pH 8.5, 15 column volumes) and applied to a Amicon Ultra centrifugal filtration device (10000 MWCO, Millipore) for concentration and buffer exchange. The protein was shown to have a purity of over 95% as assessed by SDS-PAGE.

### Enzymatic assays

NAD(P)H consumption and substrate specificity of Zmn14 were examined as described by Chhabra et al.<sup>12</sup> Purified enzyme (20 μM) was mixed with NAD(P)H (200 μM), substrate (200 μM) and buffer (10mM NaH<sub>2</sub>PO<sub>4</sub>, 0.25M NaCl, pH 7.4) and the change in NAD(P)H absorption was monitored during a period of 30 min using a Perkin Elmer LS55 fluorescence spectrometer (25°C, λ<sub>ex</sub> = 340 nm, λ<sub>em</sub> = 462 nm, 5 nm slits, 0.1 sec data interval). Test substrates used were lauroyl-CoA, butyryl-coA, octanoyl-CoA, butanal, octanal, 2-butanone and 2-octanone (Sigma).

To detect octanal conversion to octanol, a reaction was set up consisting of 100 μM purified Zmn14, 20 mM octanal, 20 mM NADH and 25 mM NH<sub>4</sub>HCO<sub>3</sub> buffer in a total volume of 500 μl. The reaction mixture was incubated overnight at room temperature and products were extracted twice with chloroform (1:1). The organic phase was subsequently dried with MgSO<sub>4</sub> and filtered using a cotton plug. One drop of N,O-Bis-(trimethylsilyl)acetamide was added, after which samples were analyzed by GC-MS (Varian 400). 5 μl samples were injected using a CP8400 sample injector in splitless mode and passed through a VF-5ms column (30m length, 0.25 mm internal diameter) using helium as a carrier gas. The temperature was held at 50 °C for 1 minute before being ramped up to 300 °C at a rate of 25 °C/min. The temperature was held at 300 °C for 9 minutes before being ramped back down. The sample was ionized using electron ionization with 70 eV electrons and detected with an ion trap mass analyzer. Two independent assays were performed.

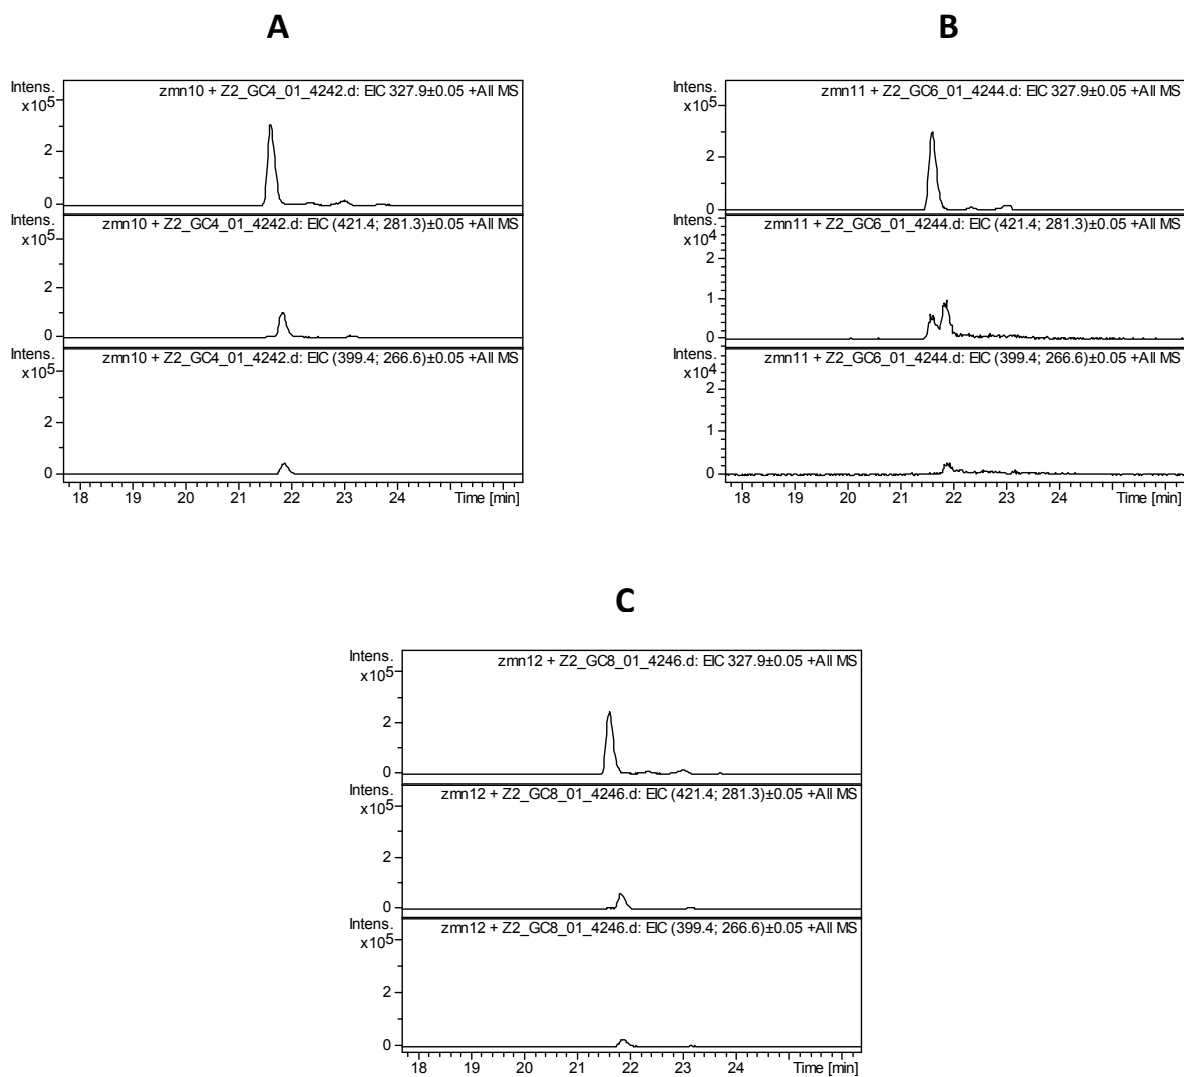

Fig. S1 Extracted ion chromatograms at  $m/z$   $327.9 \pm 0.05$  (top),  $421.4$  and  $281.3 \pm 0.05$  (middle), and  $399.4$  and  $266.6 \pm 0.05$  (bottom) from LC-ESI-MS analyses of culture supernatants from small scale feedings of zeamine II ( $[M+2H]^{2+} = 327.8533$ ) (**1**) to the *zmn10* (A), *zmn11* (B) and *zmn12* (C) mutants. Production of zeamine ( $[M+2H]^{2+} = 421.4138$ ,  $[M+3H]^{3+} = 281.2784$ ) (**2**) and zeamine I ( $[M+2H]^{2+} = 399.4006$ ,  $[M+3H]^{3+} = 266.6030$ ) (**3**) can be observed when **1** is added to the cultivation medium, implicating the PUFA synthase-like multienzyme complex in the biosynthesis of **1**.

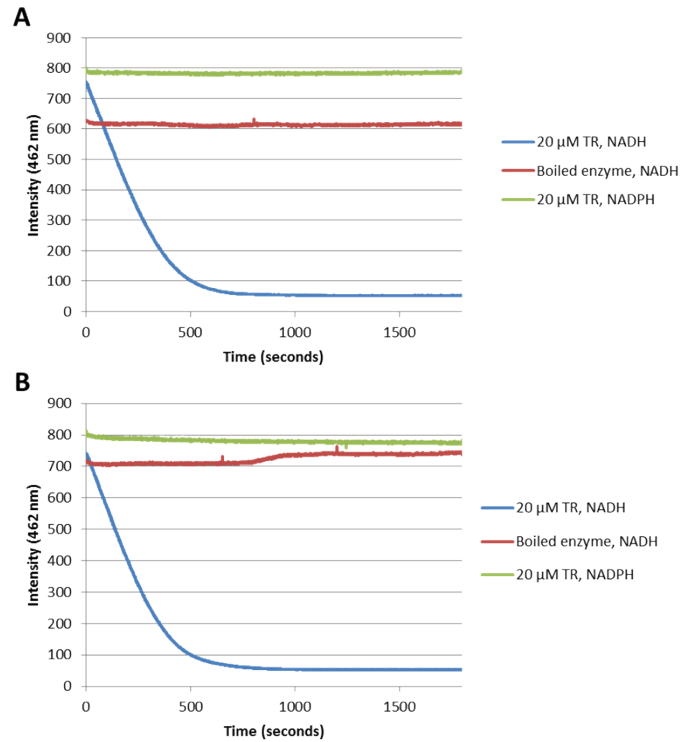

Fig. S2 Consumption of NADH when Zmn14 is incubated with either butanoyl-CoA (A) or octanoyl-CoA (B). The change in fluorescence emission at 462 nm was monitored.

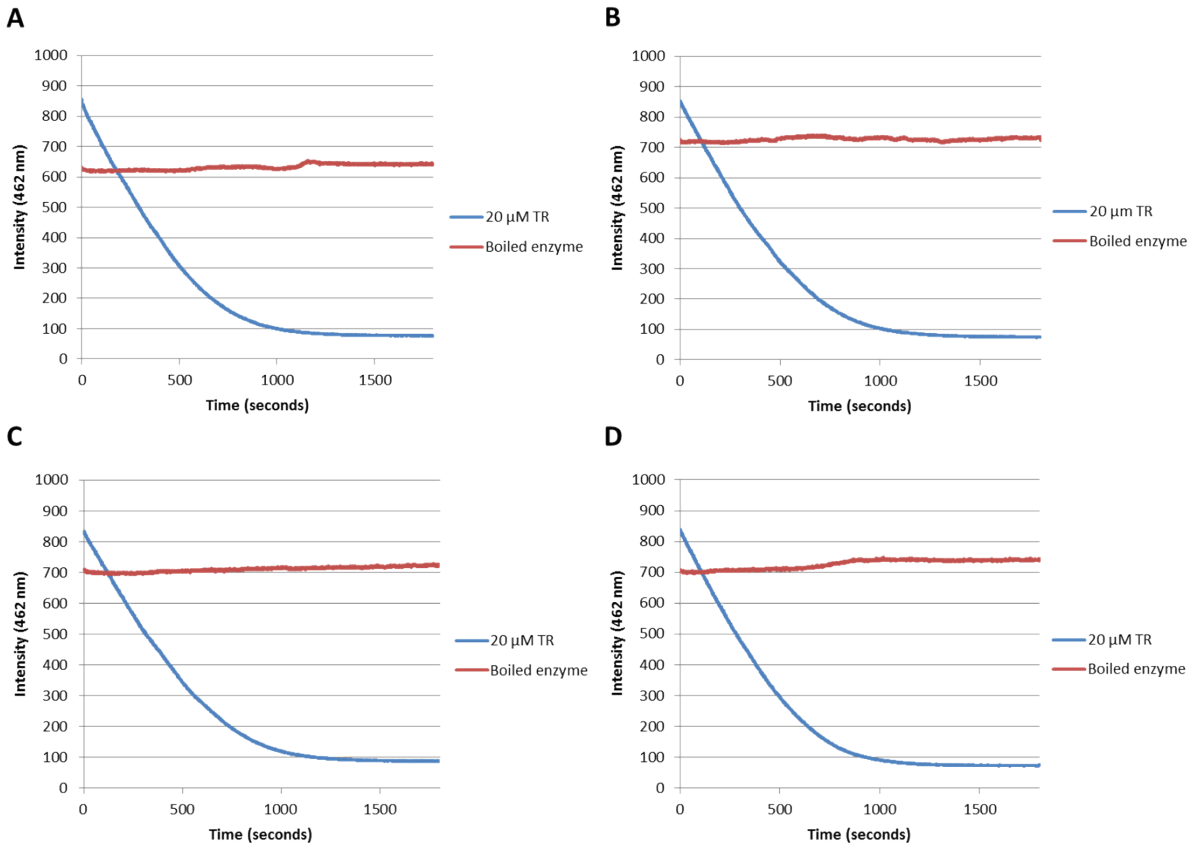

Fig. S3 Consumption of NADH when Zmn14 is incubated with butanal (A), octanal (B), butanone (C) or octanone (D). The change in fluorescence emission at 462 nm was monitored.

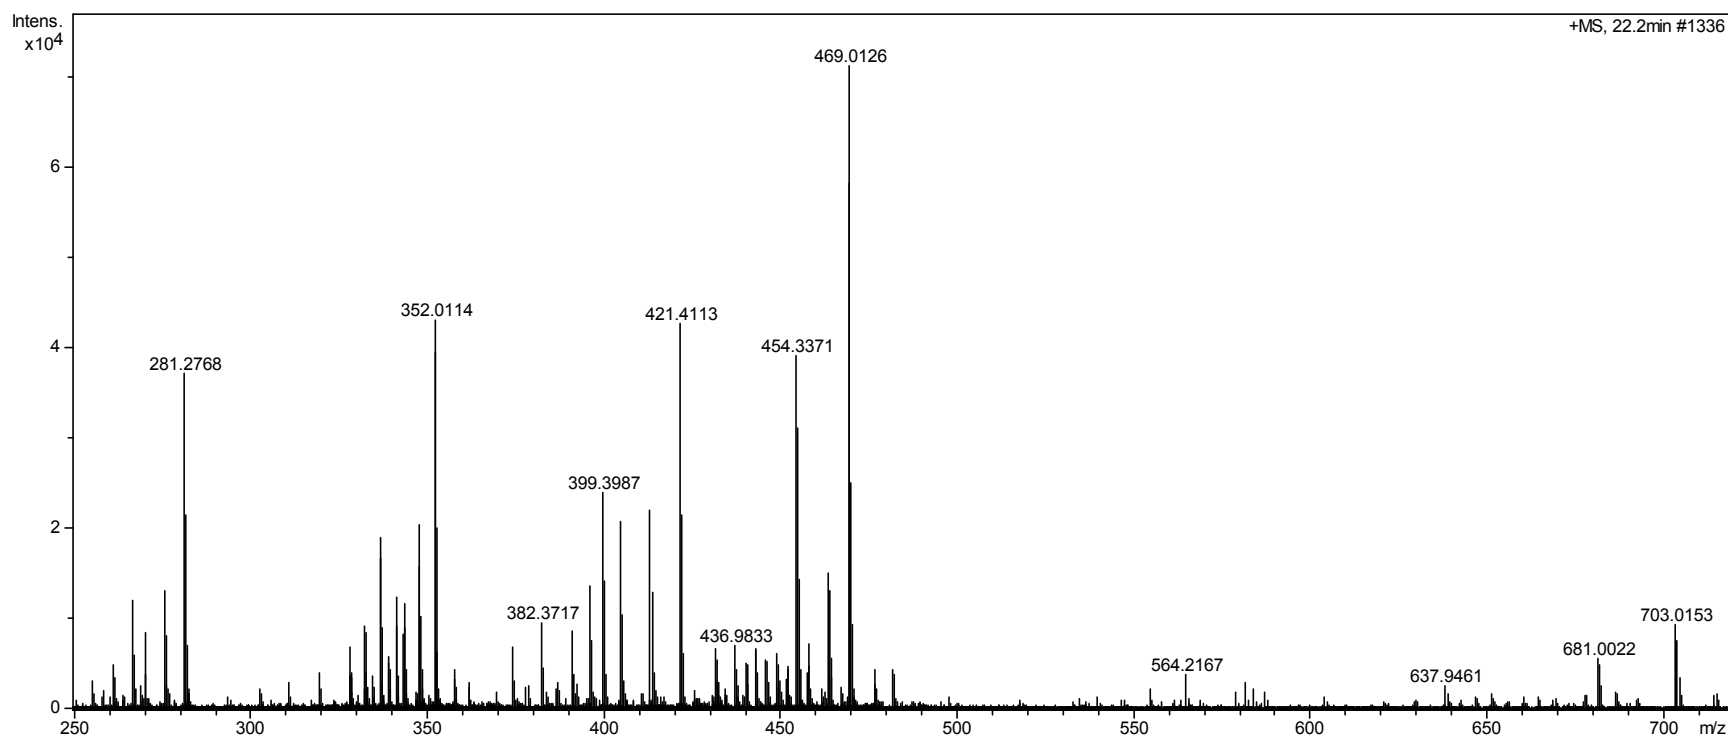

Fig. S4 High resolution mass spectrum of zeamines detected in wild type *S. plymuthica* RVH1 culture supernatant. Multiply-charged ions derived from zeamine ( $m/z = 841.8191$ ), zeamine I ( $m/z = 797.7929$ ), zeamine II ( $m/z = 654.6983$ ), prezeamine ( $m/z = 1405.0286$ ) and prezeamine I ( $m/z = 1361.0023$ ) can be detected.



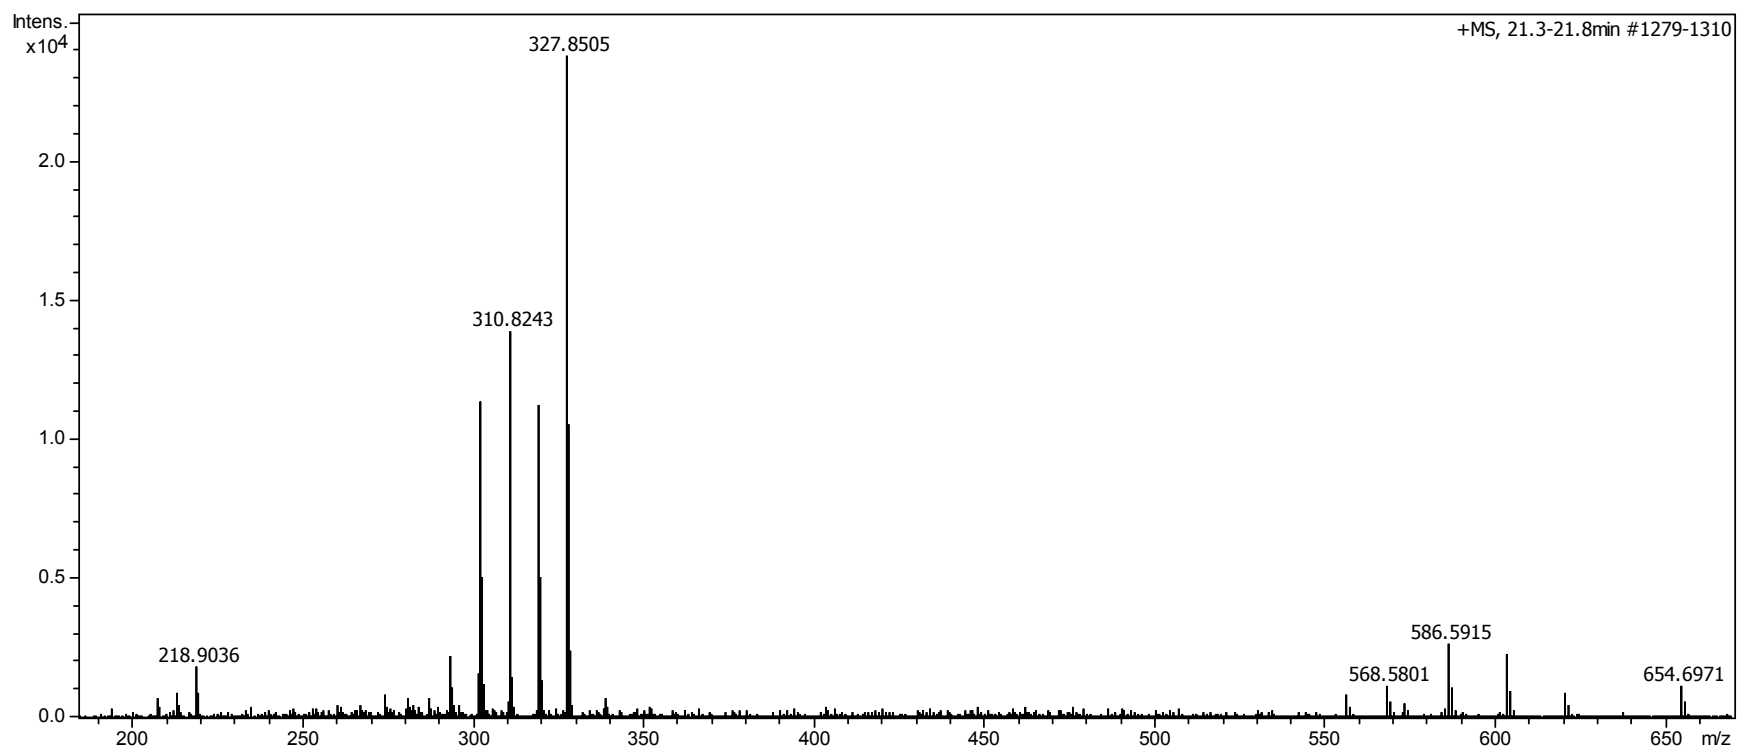

Fig. S5 High resolution mass spectrum of zeamine antibiotics accumulated in the culture supernatant of the *zmn17* deletion mutant. Only singly and multiply charged ions derived from zeamine II ( $m/z = 654.6971$ ) were observed. Analogous results were observed for the  $\Delta zmn16$ ,  $\Delta zmn18$  and  $\Delta zmn19$  strains.

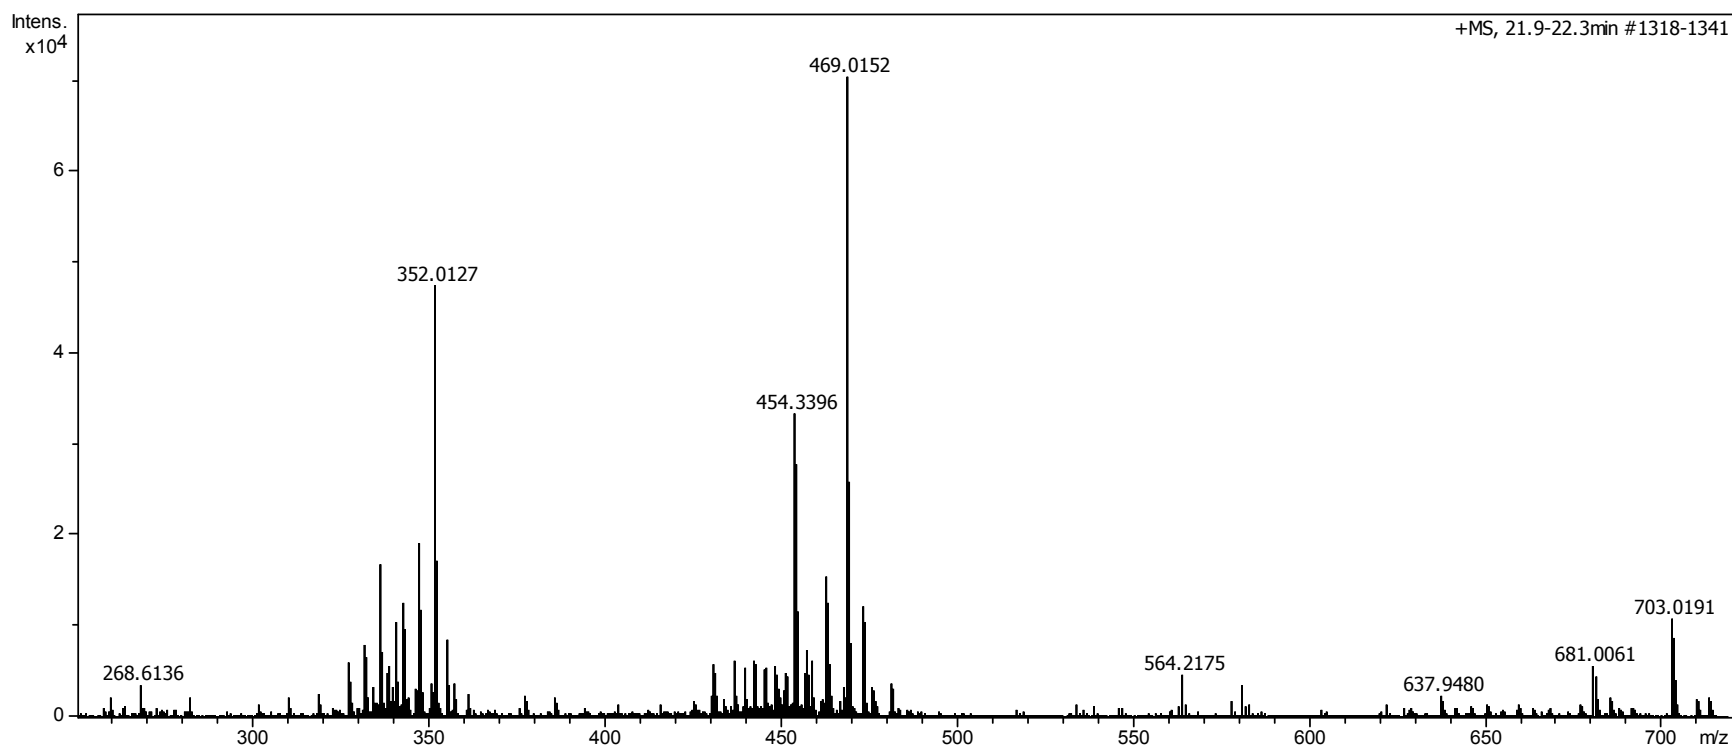

Fig. S6 High resolution mass spectrum of zeamines accumulated in the culture supernatant of the *zmn22* deletion mutant. Only singly and multiply charged ions derived from zeamine II ( $m/z = 654.6971$ ), prezeamine ( $m/z = 1405.0286$ ) and prezeamine I ( $m/z = 1361.0023$ ) were observed.

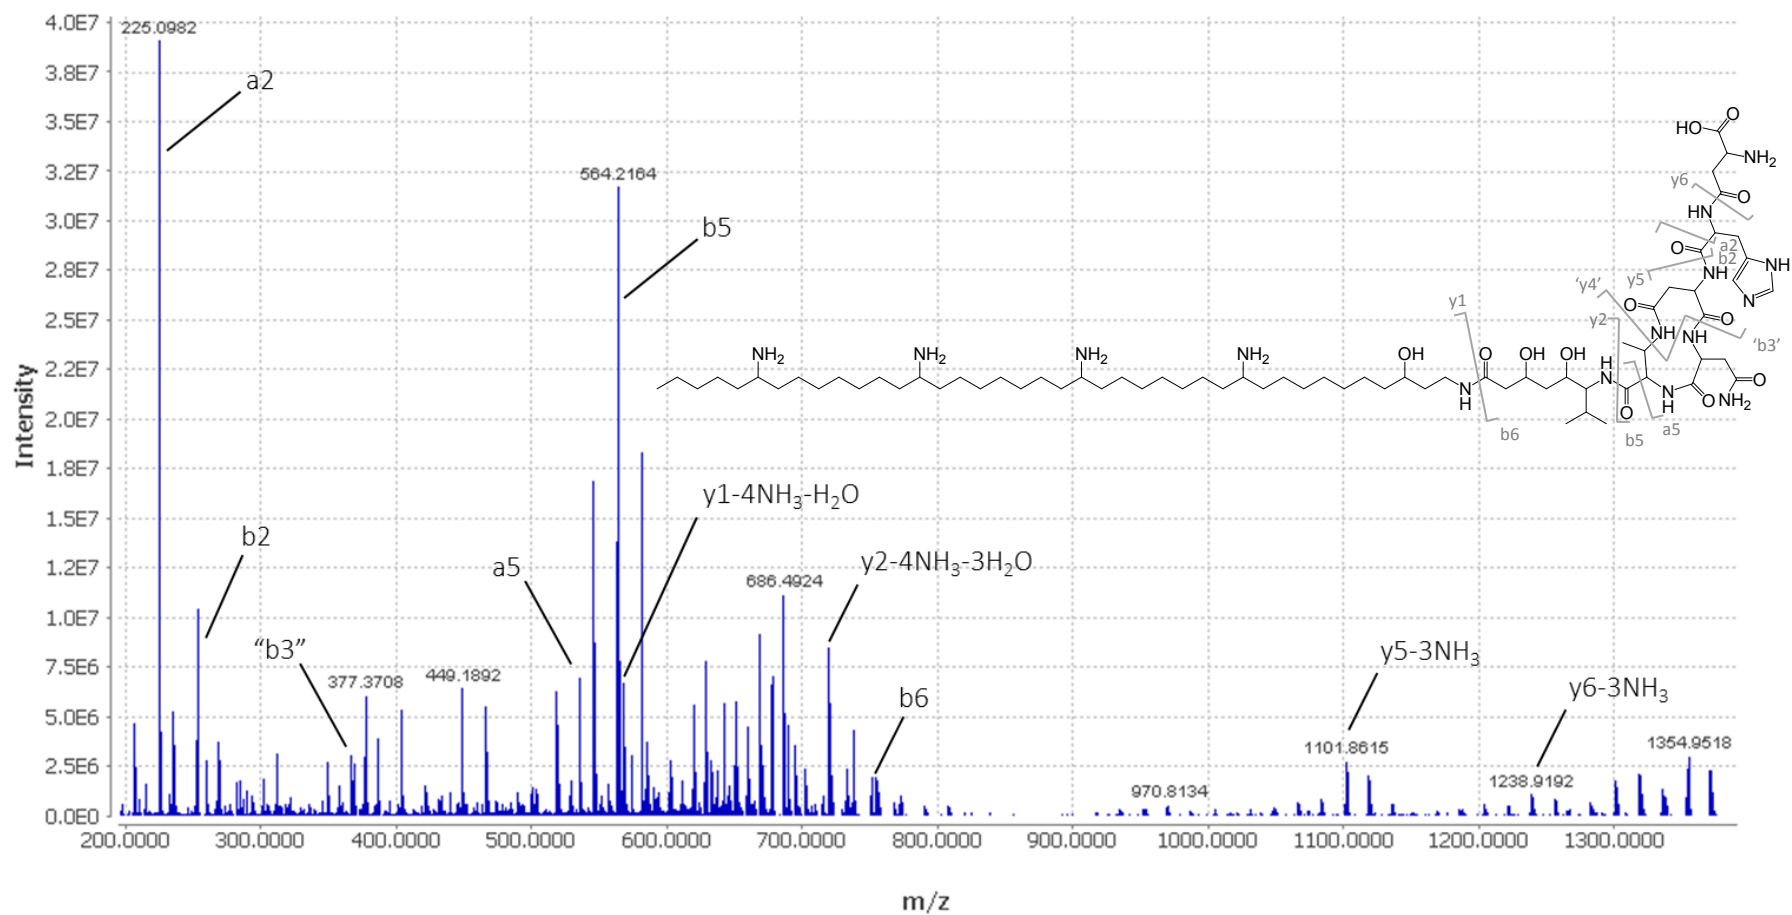

Fig. S7 High resolution LC-ESI-MS/MS spectrum of prezeamine (**4**) ( $[M+3H]^{3+} = 469.0150$  Da). Selected a, b and y-fragment ions are indicated. A comprehensive overview of the detected fragment ions and their molecular formulae, calculated  $m/z$  and observed  $m/z$  is shown in table S2. Inset: structure of prezeamine and detected fragment ions.

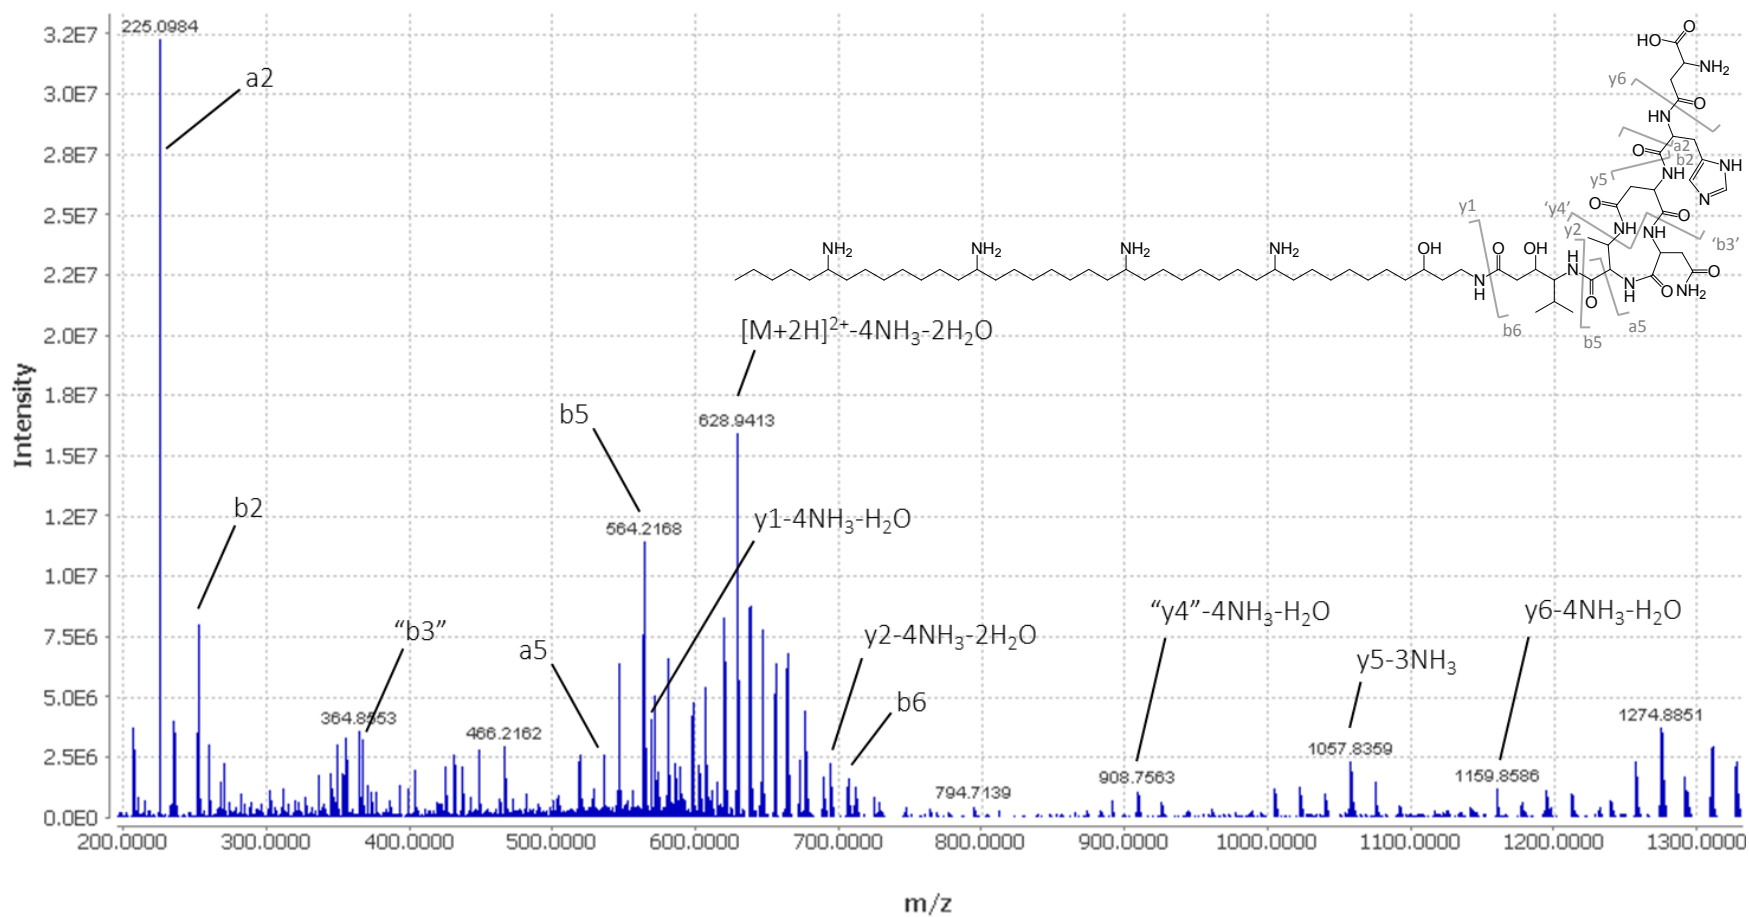

Fig. S8 High resolution LC-ESI-MS/MS spectrum of prezeamine I (**5**) ( $[M+3H]^{3+} = 454.3400$  Da). Selected a, b and y-fragment ions are indicated. A comprehensive overview of the detected fragment ions and their molecular formulae, calculated  $m/z$  and observed  $m/z$  is shown in table S3. Inset: structure of prezeamine I and detected fragment ions.

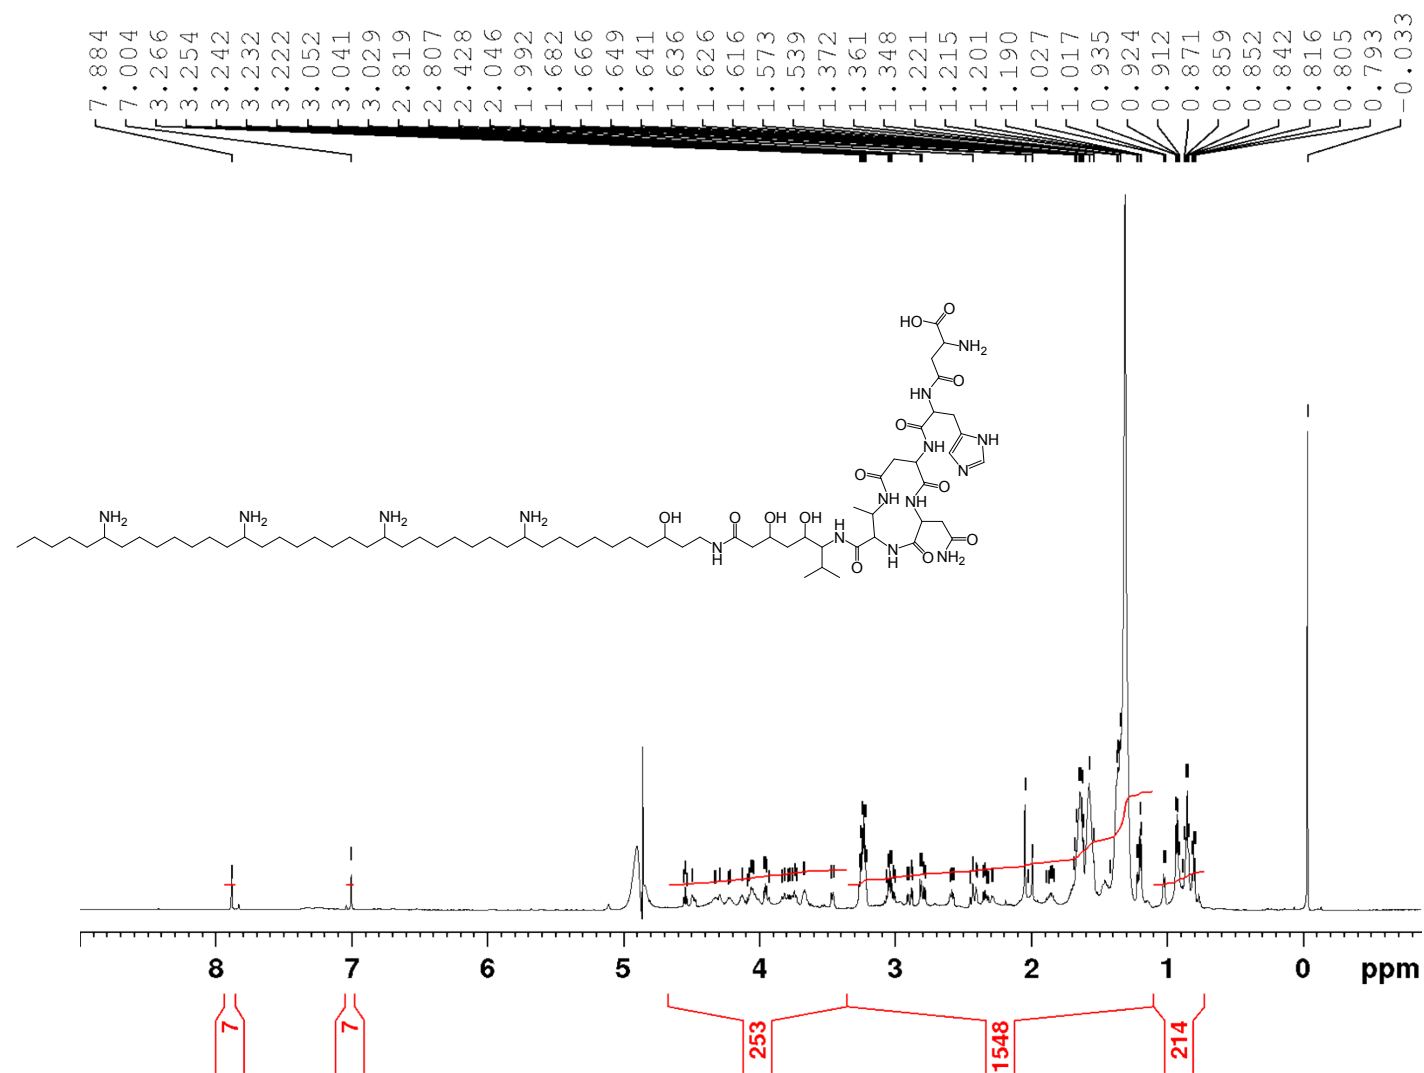

Fig. S9 <sup>1</sup>H NMR spectrum of prezeamine (**4**) in D<sub>2</sub>O at 288K (600.13 MHz). Presaturation was used to reduce the HOD signal at 4.87ppm.

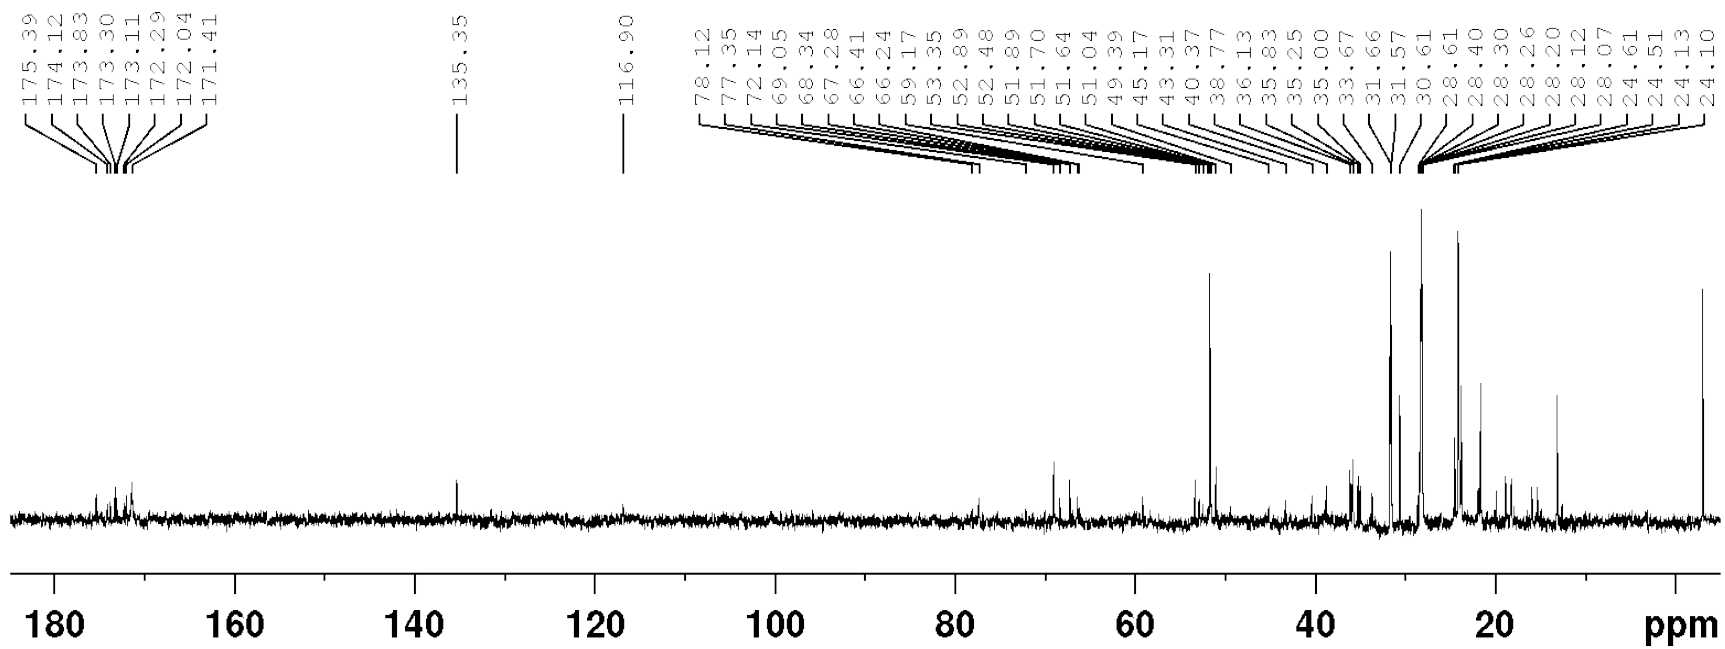

Fig. S10 Proton decoupled  $^{13}\text{C}$  NMR spectrum of prezeamine (**4**) in  $\text{D}_2\text{O}$  at 288K (150.92 MHz).

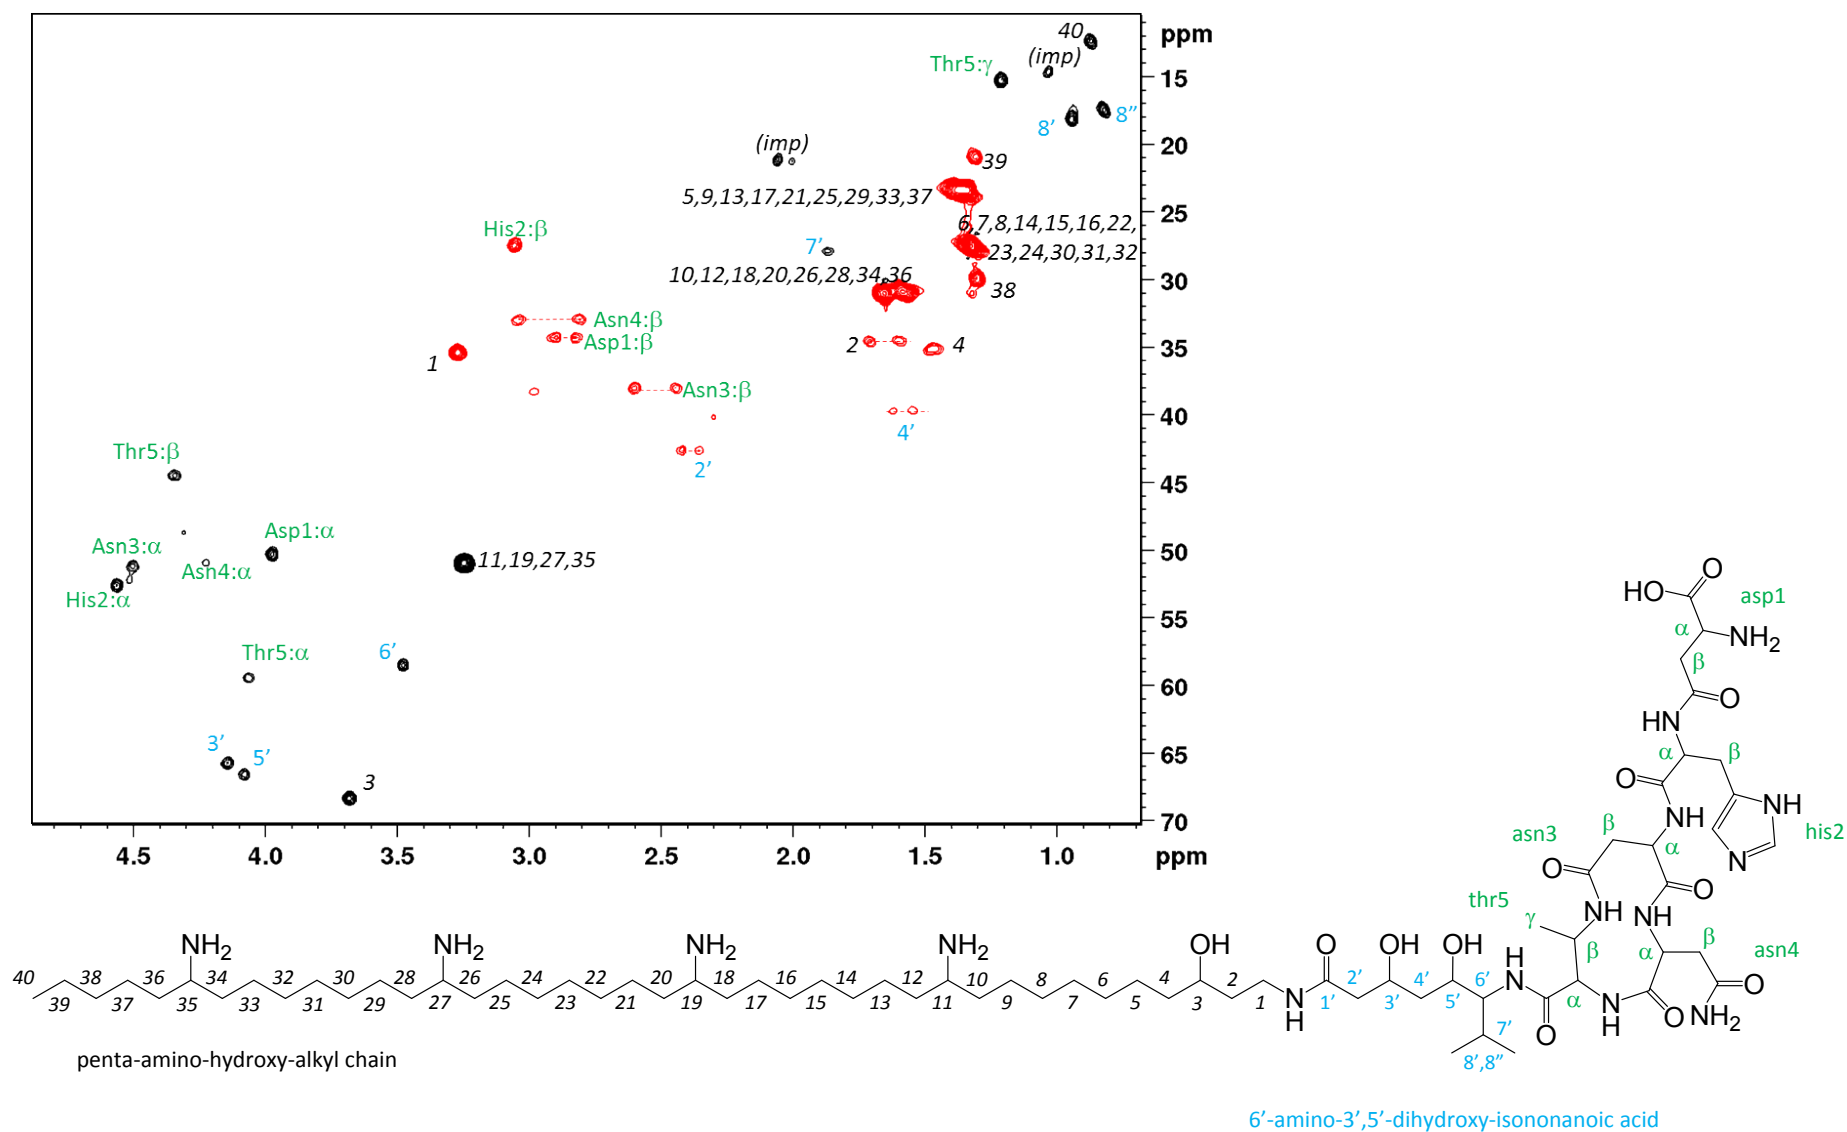

Fig. S11 Multiplicity edited HSQC NMR spectrum of prezeamine (4) in D<sub>2</sub>O at 288K

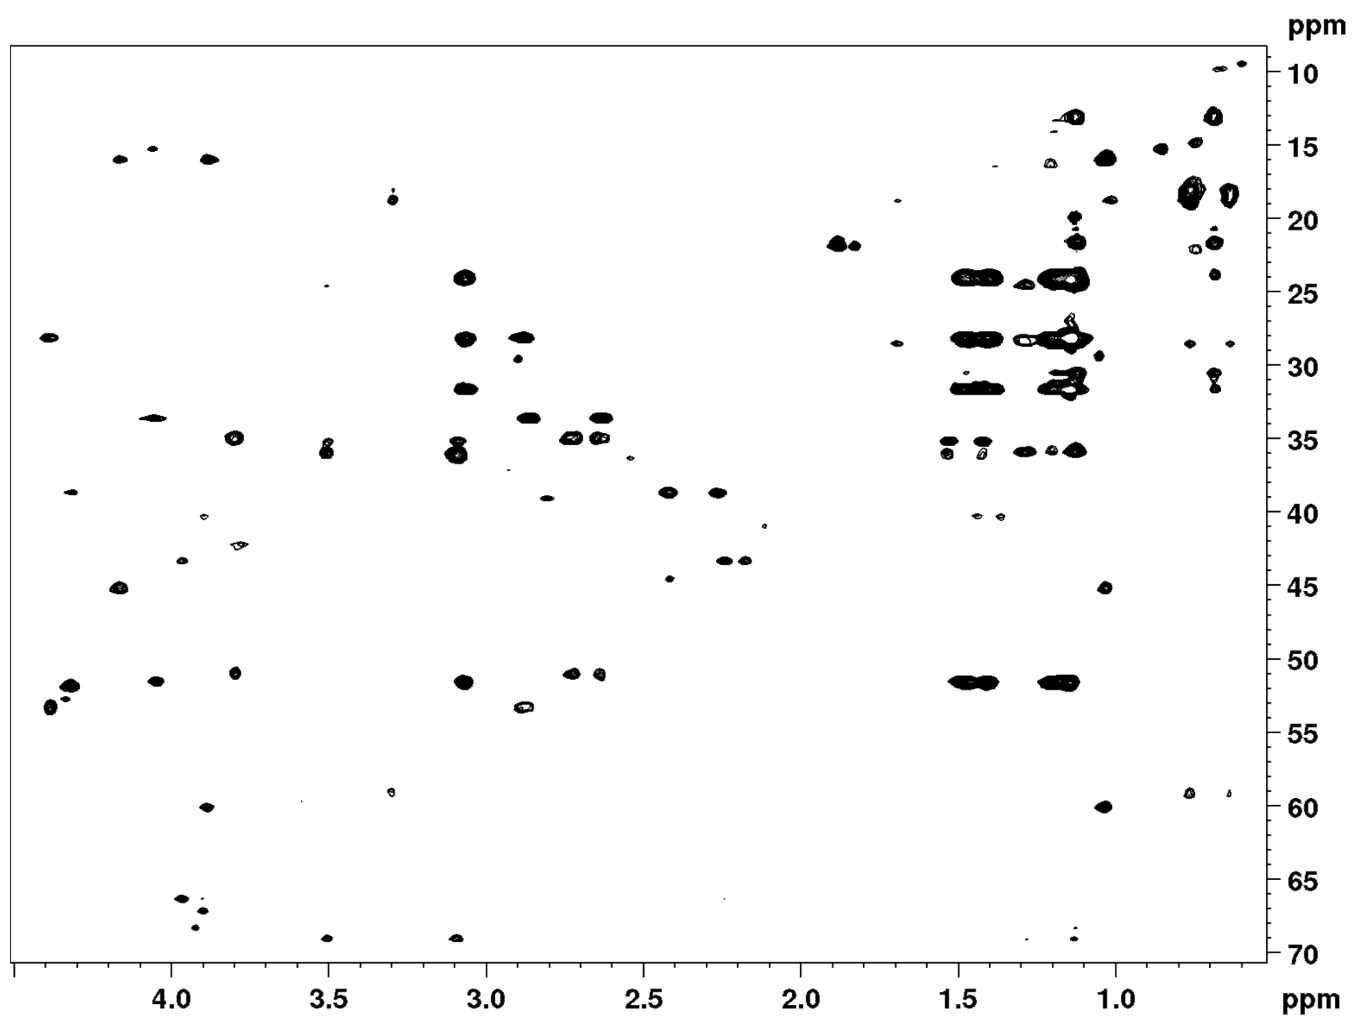

Fig. S12 HSQC-TOCSY NMR spectrum of prezeamine (**4**) in D<sub>2</sub>O at 288K.



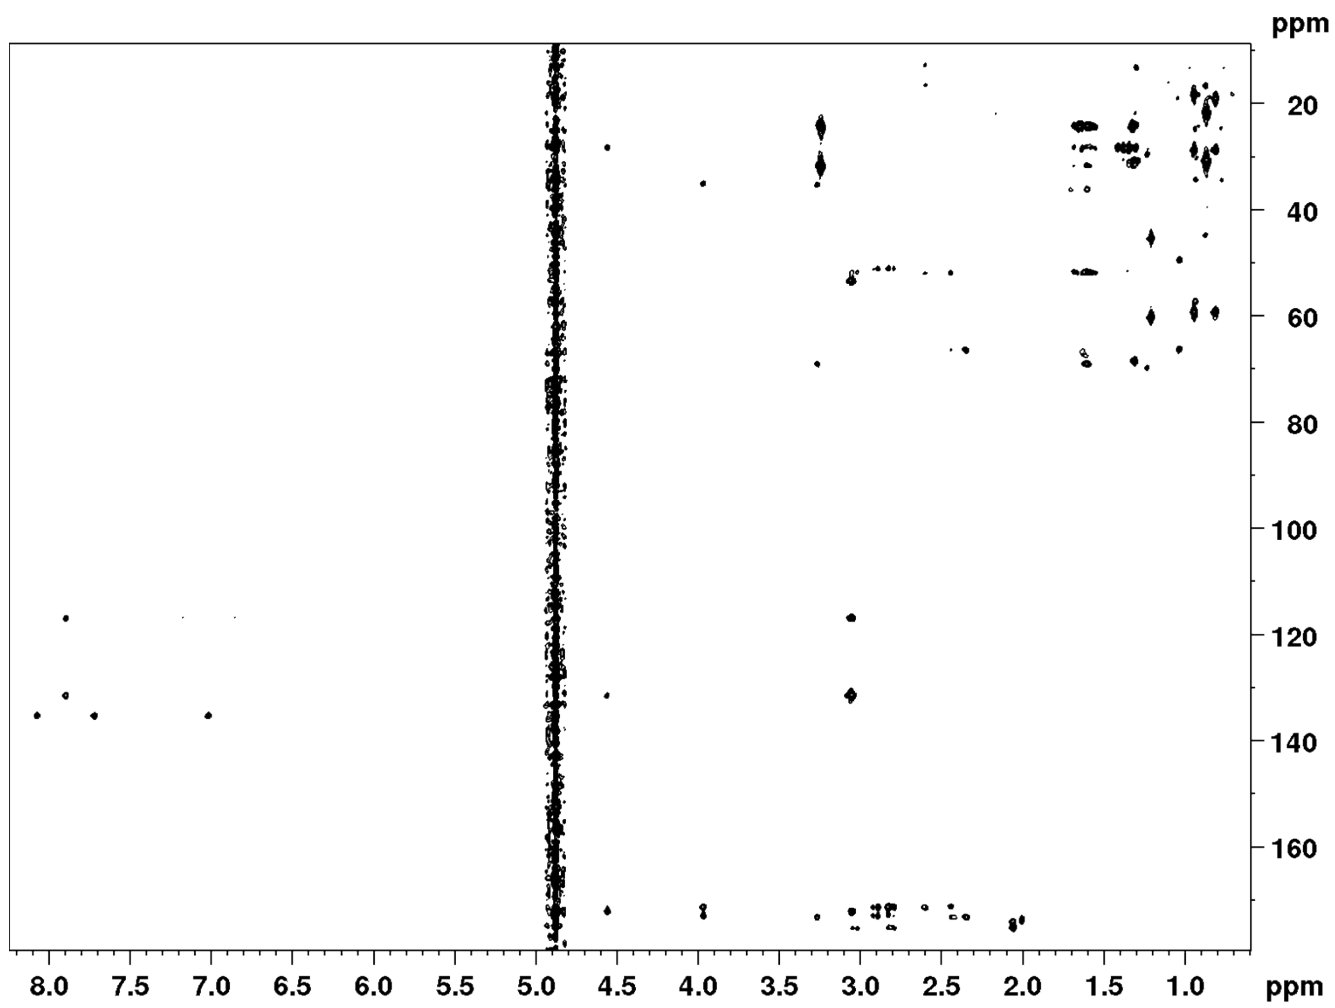

Fig. S13 HMBC NMR spectrum of prezeamine (4) in  $\text{D}_2\text{O}$  at 288K.

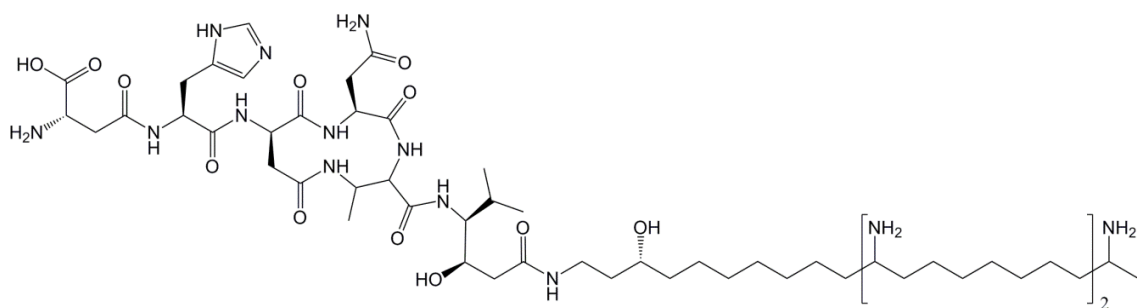

Fig. S14 Postulated structure of fabclavine IVa from *Xenorhabdus szentirmaii*.<sup>13</sup>

Table S1. Overview of gene deletions and complementations.

| Strain        | Size (aa) <sup>a</sup> | Function                               | Bioassay <sup>b</sup> | Produced zeamines           | Complementation bioassay <sup>b</sup> |
|---------------|------------------------|----------------------------------------|-----------------------|-----------------------------|---------------------------------------|
| <i>Δzmn10</i> | 2259                   | PKS                                    | 0                     | none                        |                                       |
| <i>Δzmn11</i> | 1436                   | FAS/PKS                                | 0                     | none                        |                                       |
| <i>Δzmn12</i> | 1010                   | PfaD family protein                    | 0                     | none                        |                                       |
| <i>Δzmn13</i> | 255                    | 3-oxoacyl-ACP reductase                | 0                     | none                        | 100 (0.5 mM IPTG)                     |
| <i>Δzmn14</i> | 412                    | Thioester reductase                    | 0                     | none                        | 89 (0.1 mM IPTG)                      |
| <i>Δzmn15</i> | 259                    | Carbon-nitrogen hydrolase              | 36                    | (pre)zeamine (I) zeamine II | 86 (0.1 mM IPTG)                      |
| <i>Δzmn16</i> | 4169                   | NRPS                                   | 48                    | zeamine II                  |                                       |
| <i>Δzmn17</i> | 2180                   | NRPS                                   | 48                    | zeamine II                  |                                       |
| <i>Δzmn18</i> | 1531                   | PKS                                    | 48                    | zeamine II                  |                                       |
| <i>Δzmn19</i> | 439                    | Condensation domain-containing protein | 48                    | zeamine II                  | 100 (0.5 mM IPTG)                     |
| <i>Δzmn22</i> | 345                    | Acylpeptide hydrolase                  | 48                    | prezeamine (I), zeamine II  | 115 (0mM IPTG)                        |

<sup>a</sup> Size of the translated CDSs prior to *in frame* deletion

<sup>b</sup> Average inhibition zone area minus colony area, expressed as percentage of WT

Table S2. Fragment ions, molecular formulae, calculated  $m/z$  and observed  $m/z$  from high resolution LC-ESI-MS/MS analysis of prezeamine (**4**). The corresponding spectrum is shown in Fig. S6.

| Fragment-ion                             | Molecular formula                                               | Calculated $m/z$ | Observed $m/z$ | Error (Da) | Error (ppm) | Fragment-ion                                              | Molecular formula                                                | Calculated $m/z$ | Observed $m/z$ | Error (Da) | Error (ppm) |
|------------------------------------------|-----------------------------------------------------------------|------------------|----------------|------------|-------------|-----------------------------------------------------------|------------------------------------------------------------------|------------------|----------------|------------|-------------|
| a2                                       | C <sub>9</sub> H <sub>13</sub> N <sub>4</sub> O <sub>3</sub>    | 225.0988         | 225.0982       | 0.0006     | 2.67        | y5                                                        | C <sub>61</sub> H <sub>122</sub> N <sub>11</sub> O <sub>9</sub>  | 1152.9427        | n.d.           |            |             |
| a5                                       | C <sub>21</sub> H <sub>30</sub> N <sub>9</sub> O <sub>8</sub>   | 536.2217         | 536.2214       | 0.0003     | 0.56        | y5-NH <sub>3</sub>                                        | C <sub>61</sub> H <sub>119</sub> N <sub>10</sub> O <sub>9</sub>  | 1135.9161        | 1135.9156      | 0.0005     | 0.44        |
| a5-H <sub>2</sub> O                      | C <sub>21</sub> H <sub>28</sub> N <sub>9</sub> O <sub>7</sub>   | 518.2112         | 518.2110       | 0.0002     | 0.39        | y5-2NH <sub>3</sub>                                       | C <sub>61</sub> H <sub>116</sub> N <sub>9</sub> O <sub>9</sub>   | 1118.8895        | 1118.8889      | 0.0006     | 0.54        |
| b2                                       | C <sub>10</sub> H <sub>13</sub> N <sub>4</sub> O <sub>4</sub>   | 253.0937         | 253.0931       | 0.0006     | 2.37        | y5-3NH <sub>3</sub>                                       | C <sub>61</sub> H <sub>113</sub> N <sub>8</sub> O <sub>9</sub>   | 1101.8631        | 1101.8615      | 0.0016     | 1.45        |
| "b3"                                     | C <sub>14</sub> H <sub>19</sub> N <sub>6</sub> O <sub>6</sub>   | 367.1366         | 367.1361       | 0.0005     | 1.36        | y5-3NH <sub>3</sub> -H <sub>2</sub> O                     | C <sub>61</sub> H <sub>111</sub> N <sub>8</sub> O <sub>8</sub>   | 1083.8524        | 1083.8512      | 0.0012     | 1.11        |
| b5                                       | C <sub>22</sub> H <sub>30</sub> N <sub>9</sub> O <sub>9</sub>   | 564.2166         | 564.2164       | 0.0002     | 0.35        | y6                                                        | C <sub>67</sub> H <sub>129</sub> N <sub>14</sub> O <sub>10</sub> | 1290.0016        | n.d.           |            |             |
| b5-H <sub>2</sub> O                      | C <sub>22</sub> H <sub>28</sub> N <sub>9</sub> O <sub>8</sub>   | 546.2061         | 546.2057       | 0.0004     | 0.73        | y6-2NH <sub>3</sub>                                       | C <sub>67</sub> H <sub>123</sub> N <sub>12</sub> O <sub>10</sub> | 1255.9485        | 1255.9482      | 0.0003     | 0.24        |
| b6                                       | C <sub>31</sub> H <sub>47</sub> N <sub>10</sub> O <sub>12</sub> | 751.3375         | 751.3366       | 0.0009     | 1.20        | y6-3NH <sub>3</sub>                                       | C <sub>67</sub> H <sub>120</sub> N <sub>11</sub> O <sub>10</sub> | 1238.9219        | 1238.9192      | 0.0027     | 2.18        |
| b6-H <sub>2</sub> O                      | C <sub>31</sub> H <sub>45</sub> N <sub>10</sub> O <sub>11</sub> | 733.3269         | 733.3265       | 0.0004     | 0.55        | y6-4NH <sub>3</sub>                                       | C <sub>67</sub> H <sub>117</sub> N <sub>10</sub> O <sub>10</sub> | 1221.8954        | 1221.8920      | 0.0034     | 2.78        |
| y1                                       | C <sub>40</sub> H <sub>88</sub> N <sub>5</sub> O                | 654.6989         | n.d.           |            |             | y6 <sup>2+</sup> -NH <sub>3</sub>                         | C <sub>67</sub> H <sub>127</sub> N <sub>13</sub> O <sub>10</sub> | 636.9914         | 636.9910       | 0.0004     | 0.63        |
| y1-2NH <sub>3</sub> -H <sub>2</sub> O    | C <sub>40</sub> H <sub>80</sub> N <sub>3</sub>                  | 602.6352         | 602.6348       | 0.0004     | 0.66        | y6 <sup>2+</sup> -2NH <sub>3</sub>                        | C <sub>67</sub> H <sub>124</sub> N <sub>12</sub> O <sub>10</sub> | 628.4781         | 628.4775       | 0.0006     | 0.95        |
| y1-3NH <sub>3</sub> -H <sub>2</sub> O    | C <sub>40</sub> H <sub>77</sub> N <sub>2</sub>                  | 585.6086         | 585.6083       | 0.0003     | 0.51        | y6 <sup>2+</sup> -3NH <sub>3</sub>                        | C <sub>67</sub> H <sub>121</sub> N <sub>11</sub> O <sub>10</sub> | 619.9649         | 619.9640       | 0.0009     | 1.45        |
| y1-4NH <sub>3</sub> -H <sub>2</sub> O    | C <sub>40</sub> H <sub>74</sub> N                               | 568.5821         | 568.5818       | 0.0003     | 0.53        | y6 <sup>2+</sup> -3NH <sub>3</sub> -H <sub>2</sub> O      | C <sub>67</sub> H <sub>119</sub> N <sub>11</sub> O <sub>9</sub>  | 610.9596         | 610.9585       | 0.0011     | 1.80        |
| y2                                       | C <sub>49</sub> H <sub>105</sub> N <sub>6</sub> O <sub>4</sub>  | 841.8197         | n.d.           |            |             | [M+H] <sup>+</sup> -2NH <sub>3</sub>                      | C <sub>71</sub> H <sub>128</sub> N <sub>13</sub> O <sub>13</sub> | 1370.9754        | 1370.9763      | 0.0009     | 0.66        |
| y2-2NH <sub>3</sub>                      | C <sub>49</sub> H <sub>99</sub> N <sub>4</sub> O <sub>4</sub>   | 807.7666         | 807.7667       | 0.0001     | 0.12        | [M+H] <sup>+</sup> -3NH <sub>3</sub>                      | C <sub>71</sub> H <sub>125</sub> N <sub>12</sub> O <sub>13</sub> | 1353.9488        | 1353.9467      | 0.0021     | 1.55        |
| y2-3NH <sub>3</sub>                      | C <sub>49</sub> H <sub>96</sub> N <sub>3</sub> O <sub>4</sub>   | 790.7400         | 790.7399       | 0.0001     | 0.13        | [M+H] <sup>+</sup> -3NH <sub>3</sub> -H <sub>2</sub> O    | C <sub>71</sub> H <sub>123</sub> N <sub>12</sub> O <sub>12</sub> | 1335.9383        | 1335.9375      | 0.0008     | 0.60        |
| y2-3NH <sub>3</sub> -H <sub>2</sub> O    | C <sub>49</sub> H <sub>94</sub> N <sub>3</sub> O <sub>3</sub>   | 772.7295         | 772.7285       | 0.0010     | 1.29        | [M+H] <sup>+</sup> -4NH <sub>3</sub> -H <sub>2</sub> O    | C <sub>71</sub> H <sub>120</sub> N <sub>11</sub> O <sub>12</sub> | 1318.9117        | 1318.9094      | 0.0023     | 1.74        |
| y2-3NH <sub>3</sub> -2H <sub>2</sub> O   | C <sub>49</sub> H <sub>92</sub> N <sub>3</sub> O <sub>2</sub>   | 754.7189         | 754.7186       | 0.0003     | 0.40        | [M+H] <sup>+</sup> -4NH <sub>3</sub> -2H <sub>2</sub> O   | C <sub>71</sub> H <sub>118</sub> N <sub>11</sub> O <sub>11</sub> | 1300.9012        | 1300.9010      | 0.0002     | 0.15        |
| y2-4NH <sub>3</sub> -2H <sub>2</sub> O   | C <sub>49</sub> H <sub>89</sub> N <sub>2</sub> O <sub>2</sub>   | 737.6924         | 737.6918       | 0.0006     | 0.81        | [M+H] <sup>+</sup> -4NH <sub>3</sub> -3H <sub>2</sub> O   | C <sub>71</sub> H <sub>116</sub> N <sub>11</sub> O <sub>10</sub> | 1282.8906        | 1282.8910      | 0.0001     | 0.08        |
| y2-4NH <sub>3</sub> -3H <sub>2</sub> O   | C <sub>49</sub> H <sub>87</sub> N <sub>2</sub> O                | 719.6818         | 719.6813       | 0.0005     | 0.69        | [M+2H] <sup>2+</sup> -NH <sub>3</sub>                     | C <sub>71</sub> H <sub>132</sub> N <sub>14</sub> O <sub>13</sub> | 694.5049         | 694.5042       | 0.0007     | 1.01        |
| "y4"                                     | C <sub>57</sub> H <sub>116</sub> N <sub>9</sub> O <sub>7</sub>  | 1038.8998        | n.d.           |            |             | [M+2H] <sup>2+</sup> -2NH <sub>3</sub>                    | C <sub>71</sub> H <sub>129</sub> N <sub>13</sub> O <sub>13</sub> | 685.9916         | 685.9904       | 0.0012     | 1.75        |
| "y4"-NH <sub>3</sub>                     | C <sub>57</sub> H <sub>113</sub> N <sub>8</sub> O <sub>7</sub>  | 1004.8466        | 1004.8452      | 0.0014     | 1.39        | [M+2H] <sup>2+</sup> -2NH <sub>3</sub> -H <sub>2</sub> O  | C <sub>71</sub> H <sub>127</sub> N <sub>13</sub> O <sub>12</sub> | 676.9863         | 676.9856       | 0.0007     | 1.03        |
| "y4"-2NH <sub>3</sub> -H <sub>2</sub> O  | C <sub>57</sub> H <sub>108</sub> N <sub>7</sub> O <sub>6</sub>  | 986.8361         | 986.8343       | 0.0018     | 1.82        | [M+2H] <sup>2+</sup> -3NH <sub>3</sub> -H <sub>2</sub> O  | C <sub>71</sub> H <sub>124</sub> N <sub>12</sub> O <sub>12</sub> | 668.4731         | 668.4717       | 0.0014     | 2.09        |
| "y4"-3NH <sub>3</sub> -H <sub>2</sub> O  | C <sub>57</sub> H <sub>105</sub> N <sub>6</sub> O <sub>6</sub>  | 969.8095         | 969.8077       | 0.0018     | 1.86        | [M+2H] <sup>2+</sup> -3NH <sub>3</sub> -2H <sub>2</sub> O | C <sub>71</sub> H <sub>122</sub> N <sub>12</sub> O <sub>11</sub> | 659.4678         | 659.4664       | 0.0014     | 2.12        |
| "y4"-3NH <sub>3</sub> -2H <sub>2</sub> O | C <sub>57</sub> H <sub>103</sub> N <sub>6</sub> O <sub>5</sub>  | 951.7989         | 951.7990       | 0.0001     | 0.11        | [M+2H] <sup>2+</sup> -3NH <sub>3</sub> -3H <sub>2</sub> O | C <sub>71</sub> H <sub>120</sub> N <sub>12</sub> O <sub>10</sub> | 650.4625         | 650.4619       | 0.0006     | 0.92        |
| "y4"-4NH <sub>3</sub> -2H <sub>2</sub> O | C <sub>57</sub> H <sub>100</sub> N <sub>5</sub> O <sub>5</sub>  | 934.7724         | 934.7710       | 0.0014     | 1.50        |                                                           |                                                                  |                  |                |            |             |

Table S3. Fragment ions, molecular formulae, calculated m/z and observed m/z from high resolution LC-ESI-MS/MS analysis of prezeamine I (5). The corresponding spectrum is shown in Fig. S7.

| Fragment-ion                             | Molecular formula                                               | Calculated m/z | Observed m/z | Error (Da) | Error (ppm) | Fragment-ion                                              | Molecular formula                                                | Calculated m/z | Observed m/z | Error (Da) | Error (ppm) |
|------------------------------------------|-----------------------------------------------------------------|----------------|--------------|------------|-------------|-----------------------------------------------------------|------------------------------------------------------------------|----------------|--------------|------------|-------------|
| a2                                       | C <sub>9</sub> H <sub>13</sub> N <sub>4</sub> O <sub>3</sub>    | 225.0988       | 225.0984     | 0.0004     | 1.78        | y5-3NH <sub>3</sub> -H <sub>2</sub> O                     | C <sub>59</sub> H <sub>107</sub> N <sub>8</sub> O <sub>7</sub>   | 1039.8262      | 1039.8262    | 0          | 0.00        |
| a5                                       | C <sub>21</sub> H <sub>30</sub> N <sub>9</sub> O <sub>8</sub>   | 536.2217       | 536.2218     | 0.0001     | 0.19        | y5-4NH <sub>3</sub> -H <sub>2</sub> O                     | C <sub>59</sub> H <sub>104</sub> N <sub>7</sub> O <sub>7</sub>   | 1022.7997      | 1022.7994    | 0.0003     | 0.29        |
| a5-H <sub>2</sub> O                      | C <sub>21</sub> H <sub>28</sub> N <sub>9</sub> O <sub>7</sub>   | 518.2112       | 518.2114     | 0.0002     | 0.39        | y5-4NH <sub>3</sub> -2H <sub>2</sub> O                    | C <sub>59</sub> H <sub>102</sub> N <sub>7</sub> O <sub>6</sub>   | 1004.7891      | 1004.7891    | 0          | 0.00        |
| b2                                       | C <sub>10</sub> H <sub>13</sub> N <sub>4</sub> O <sub>4</sub>   | 253.0937       | 253.0932     | 0.0005     | 1.98        | y6                                                        | C <sub>65</sub> H <sub>125</sub> N <sub>14</sub> O <sub>9</sub>  | 1245.9754      | n.d.         |            |             |
| "b3"                                     | C <sub>14</sub> H <sub>19</sub> N <sub>6</sub> O <sub>6</sub>   | 367.1366       | 367.1363     | 0.0003     | 0.82        | y6-2NH <sub>3</sub>                                       | C <sub>65</sub> H <sub>119</sub> N <sub>12</sub> O <sub>9</sub>  | 1211.9222      | 1211.9233    | 0.0011     | 0.91        |
| b5                                       | C <sub>22</sub> H <sub>30</sub> N <sub>9</sub> O <sub>9</sub>   | 564.2166       | 564.2168     | 0.0002     | 0.35        | y6-3NH <sub>3</sub>                                       | C <sub>65</sub> H <sub>116</sub> N <sub>11</sub> O <sub>9</sub>  | 1194.8957      | 1194.8949    | 0.0008     | 0.67        |
| b5-H <sub>2</sub> O                      | C <sub>22</sub> H <sub>28</sub> N <sub>9</sub> O <sub>8</sub>   | 546.2061       | 546.2062     | 0.0001     | 0.18        | y6-3NH <sub>3</sub> -H <sub>2</sub> O                     | C <sub>65</sub> H <sub>114</sub> N <sub>11</sub> O <sub>8</sub>  | 1176.8851      | 1176.8859    | 0.0008     | 0.68        |
| b6                                       | C <sub>29</sub> H <sub>43</sub> N <sub>10</sub> O <sub>11</sub> | 707.3113       | 707.3108     | 0.0005     | 0.71        | y6-4NH <sub>3</sub> -H <sub>2</sub> O                     | C <sub>65</sub> H <sub>111</sub> N <sub>10</sub> O <sub>8</sub>  | 1159.8586      | 1159.8586    | 0          | 0.00        |
| b6-H <sub>2</sub> O                      | C <sub>29</sub> H <sub>41</sub> N <sub>10</sub> O <sub>10</sub> | 689.3007       | 689.3005     | 0.0002     | 0.29        | y6 <sup>2+</sup> -2NH <sub>3</sub>                        | C <sub>65</sub> H <sub>120</sub> N <sub>12</sub> O <sub>9</sub>  | 606.4650       | 606.4650     | 0          | 0.00        |
| y1                                       | C <sub>40</sub> H <sub>88</sub> N <sub>5</sub> O                | 654.6989       | n.d.         |            |             | y6 <sup>2+</sup> -3NH <sub>3</sub>                        | C <sub>65</sub> H <sub>117</sub> N <sub>11</sub> O <sub>9</sub>  | 597.9518       | 597.9516     | 0.0002     | 0.33        |
| y1-2NH <sub>3</sub> -H <sub>2</sub> O    | C <sub>40</sub> H <sub>80</sub> N <sub>3</sub>                  | 602.6352       | 602.6352     | 0          | 0.00        | y6 <sup>2+</sup> -3NH <sub>3</sub> -H <sub>2</sub> O      | C <sub>65</sub> H <sub>115</sub> N <sub>11</sub> O <sub>8</sub>  | 588.9465       | 588.9464     | 0.0001     | 0.17        |
| y1-3NH <sub>3</sub> -H <sub>2</sub> O    | C <sub>40</sub> H <sub>77</sub> N <sub>2</sub>                  | 585.6086       | 585.6088     | 0.0002     | 0.34        | [M+H] <sup>+</sup> -2NH <sub>3</sub>                      | C <sub>69</sub> H <sub>124</sub> N <sub>13</sub> O <sub>12</sub> | 1326.9492      | 1326.9506    | 0.0014     | 1.06        |
| y1-4NH <sub>3</sub> -H <sub>2</sub> O    | C <sub>40</sub> H <sub>74</sub> N                               | 568.5821       | 568.5822     | 0.0001     | 0.18        | [M+H] <sup>+</sup> -3NH <sub>3</sub>                      | C <sub>69</sub> H <sub>121</sub> N <sub>12</sub> O <sub>12</sub> | 1309.9226      | 1309.9221    | 0.0005     | 0.38        |
| y2                                       | C <sub>47</sub> H <sub>101</sub> N <sub>6</sub> O <sub>3</sub>  | 797.7935       | n.d.         |            |             | [M+H] <sup>+</sup> -3NH <sub>3</sub> -H <sub>2</sub> O    | C <sub>69</sub> H <sub>119</sub> N <sub>12</sub> O <sub>11</sub> | 1291.9121      | 1291.9124    | 0.0003     | 0.23        |
| y2-2NH <sub>3</sub>                      | C <sub>47</sub> H <sub>95</sub> N <sub>4</sub> O <sub>3</sub>   | 763.7404       | 763.7406     | 0.0001     | 0.13        | [M+H] <sup>+</sup> -4NH <sub>3</sub> -H <sub>2</sub> O    | C <sub>69</sub> H <sub>116</sub> N <sub>11</sub> O <sub>11</sub> | 1274.8855      | 1274.8851    | 0.0004     | 0.31        |
| y2-2NH <sub>3</sub> -H <sub>2</sub> O    | C <sub>47</sub> H <sub>93</sub> N <sub>4</sub> O <sub>2</sub>   | 745.7298       | 745.7299     | 0.0001     | 0.13        | [M+H] <sup>+</sup> -4NH <sub>3</sub> -2H <sub>2</sub> O   | C <sub>69</sub> H <sub>114</sub> N <sub>11</sub> O <sub>10</sub> | 1256.8750      | 1256.8756    | 0.0006     | 0.48        |
| y2-3NH <sub>3</sub> -H <sub>2</sub> O    | C <sub>47</sub> H <sub>90</sub> N <sub>3</sub> O <sub>2</sub>   | 728.7033       | 728.7033     | 0          | 0.00        | [M+H] <sup>+</sup> -4NH <sub>3</sub> -3H <sub>2</sub> O   | C <sub>69</sub> H <sub>112</sub> N <sub>11</sub> O <sub>9</sub>  | 1238.8644      | 1238.8663    | 0.0001     | 0.08        |
| y2-4NH <sub>3</sub> -H <sub>2</sub> O    | C <sub>47</sub> H <sub>87</sub> N <sub>2</sub> O <sub>2</sub>   | 711.6767       | 711.6765     | 0.0002     | 0.28        | [M+2H] <sup>2+</sup> -NH <sub>3</sub>                     | C <sub>69</sub> H <sub>128</sub> N <sub>14</sub> O <sub>12</sub> | 672.4918       | 672.4915     | 0.0003     | 0.45        |
| y2-4NH <sub>3</sub> -2H <sub>2</sub> O   | C <sub>47</sub> H <sub>85</sub> N <sub>2</sub> O                | 693.6662       | 693.6661     | 0.0001     | 0.14        | [M+2H] <sup>2+</sup> -2NH <sub>3</sub>                    | C <sub>69</sub> H <sub>125</sub> N <sub>13</sub> O <sub>12</sub> | 663.9785       | 663.9776     | 0.0009     | 1.36        |
| "y4"                                     | C <sub>55</sub> H <sub>112</sub> N <sub>9</sub> O <sub>6</sub>  | 994.8736       | n.d.         |            |             | [M+2H] <sup>2+</sup> -2NH <sub>3</sub> -H <sub>2</sub> O  | C <sub>69</sub> H <sub>123</sub> N <sub>13</sub> O <sub>11</sub> | 654.9732       | 654.9728     | 0.0004     | 0.61        |
| "y4"-2NH <sub>3</sub> -H <sub>2</sub> O  | C <sub>55</sub> H <sub>104</sub> N <sub>7</sub> O <sub>5</sub>  | 942.8098       | 942.8084     | 0.0014     | 1.48        | [M+2H] <sup>2+</sup> -3NH <sub>3</sub> -H <sub>2</sub> O  | C <sub>69</sub> H <sub>120</sub> N <sub>12</sub> O <sub>11</sub> | 646.4600       | 646.4592     | 0.0008     | 1.24        |
| "y4"-3NH <sub>3</sub> -H <sub>2</sub> O  | C <sub>55</sub> H <sub>101</sub> N <sub>6</sub> O <sub>5</sub>  | 925.7833       | 925.7829     | 0.0004     | 0.43        | [M+2H] <sup>2+</sup> -4NH <sub>3</sub> -H <sub>2</sub> O  | C <sub>69</sub> H <sub>117</sub> N <sub>11</sub> O <sub>11</sub> | 637.9467       | 637.9467     | 0          | 0.00        |
| "y4"-4NH <sub>3</sub> -H <sub>2</sub> O  | C <sub>55</sub> H <sub>98</sub> N <sub>5</sub> O <sub>5</sub>   | 908.7568       | 908.7563     | 0.0005     | 0.55        | [M+2H] <sup>2+</sup> -4NH <sub>3</sub> -2H <sub>2</sub> O | C <sub>69</sub> H <sub>115</sub> N <sub>11</sub> O <sub>10</sub> | 628.9414       | 628.9413     | 0.0001     | 0.16        |
| "y4"-4NH <sub>3</sub> -2H <sub>2</sub> O | C <sub>55</sub> H <sub>96</sub> N <sub>5</sub> O <sub>4</sub>   | 890.7462       | 890.7465     | 0.0003     | 0.34        | [M+2H] <sup>2+</sup> -4NH <sub>3</sub> -3H <sub>2</sub> O | C <sub>69</sub> H <sub>113</sub> N <sub>11</sub> O <sub>9</sub>  | 619.9361       | 619.9361     | 0          | 0.00        |
| y5                                       | C <sub>59</sub> H <sub>118</sub> N <sub>11</sub> O <sub>8</sub> | 1108.9165      | n.d.         |            |             | [M+3H] <sup>3+</sup> -NH <sub>3</sub> -H <sub>2</sub> O   | C <sub>69</sub> H <sub>127</sub> N <sub>14</sub> O <sub>11</sub> | 442.6603       | 442.6603     | 0          | 0.00        |
| y5-NH <sub>3</sub>                       | C <sub>59</sub> H <sub>115</sub> N <sub>10</sub> O <sub>8</sub> | 1091.8899      | 1091.8904    | 0.0005     | 0.46        | [M+3H] <sup>3+</sup> -2NH <sub>3</sub> -H <sub>2</sub> O  | C <sub>69</sub> H <sub>124</sub> N <sub>13</sub> O <sub>11</sub> | 436.9848       | 436.9844     | 0.0004     | 0.92        |
| y5-2NH <sub>3</sub>                      | C <sub>59</sub> H <sub>112</sub> N <sub>9</sub> O <sub>8</sub>  | 1074.8633      | 1074.8624    | 0.0009     | 0.84        | [M+3H] <sup>3+</sup> -2NH <sub>3</sub> -2H <sub>2</sub> O | C <sub>69</sub> H <sub>122</sub> N <sub>13</sub> O <sub>10</sub> | 430.9812       | 430.9812     | 0          | 0.00        |
| y5-3NH <sub>3</sub>                      | C <sub>59</sub> H <sub>109</sub> N <sub>8</sub> O <sub>8</sub>  | 1057.8368      | 1057.8359    | 0.0009     | 0.85        | [M+3H] <sup>3+</sup> -2NH <sub>3</sub> -3H <sub>2</sub> O | C <sub>69</sub> H <sub>120</sub> N <sub>13</sub> O <sub>9</sub>  | 424.9777       | 424.9775     | 0.0002     | 0.47        |

Table S4. Assignments for signals in the  $^1\text{H}$  and  $^{13}\text{C}$  NMR spectra of prezeamine (**4**) in  $\text{D}_2\text{O}$  at 288K.

|                                           |                                  | $^1\text{H}$ | $^{13}\text{C}$ |
|-------------------------------------------|----------------------------------|--------------|-----------------|
| Asp-1                                     | $\alpha$                         | 3.96         | 20.2            |
|                                           | $\beta$                          | 2.89, 2.81   | 34.2            |
|                                           | $\gamma$                         | -            | 173.1           |
|                                           | C                                | -            | 171.5           |
| His-2                                     | $\alpha$                         | 4.55         | 52.5            |
|                                           | $\beta$                          | 3.04         | 27.3            |
|                                           | $\gamma$                         | -            | 131.4           |
|                                           | $\delta$                         | 7.01         | 116.8           |
|                                           | $\epsilon$                       | 7.9          | 135.1           |
|                                           | C                                | -            | 172.3           |
| Asn-3                                     | $\alpha$                         | 4.49         | 51.01           |
|                                           | $\beta$                          | 2.59, 2.43   | 37.9            |
|                                           | $\gamma$                         | -            | 171.4           |
|                                           | C                                | -            | 172             |
| Asn-4                                     | $\alpha$                         | 4.21         | 50.8            |
|                                           | $\beta$                          | 3.03, 2.80   | 32.8            |
|                                           | $\gamma$                         | -            | 175.4           |
|                                           | C                                | -            | 172             |
| Thr-5                                     | $\alpha$                         | 4.05         | 59.3            |
|                                           | $\beta$                          | 4.33         | 44.3            |
|                                           | $\gamma$                         | 1.2          | 15.1            |
|                                           | C                                | -            | 171.4           |
| 6'-amino-3',5'-dihydroxy-isononanoic acid | 1                                | -            | 173.3           |
|                                           | 2                                | 2.41, 2.34   | 42.5            |
|                                           | 3                                | 4.13         | 65.6            |
|                                           | 4                                | 1.61, 1.54   | 39.5            |
|                                           | 5                                | 4.07         | 66.4            |
|                                           | 6                                | 3.47         | 58.4            |
|                                           | 7                                | 1.86         | 27.7            |
|                                           | 8                                | 0.93         | 17.9            |
|                                           | 9                                | 0.81         | 17.3            |
| penta-amino-hydroxy-alkyl chain           | 1                                | 2.97         | 38.2            |
|                                           | 2                                | 1.70, 1.59   | 34.4            |
|                                           | 3                                | 3.67         | 68.2            |
|                                           | 4                                | 1.46         | 35              |
|                                           | 5,9,13,17,21,25,29,33,37         | 1.35         | 23.2            |
|                                           | 6,7,8,14,15,16,22,23,24,30,31,32 | 1.31         | 27.4            |
|                                           | 10,12,18,20,26,28,34,36          | 1.61         | 30.8            |
|                                           | 11,19,27,35                      | 3.23         | 50.8            |
|                                           | 38                               | 1.3          | 29.8            |
|                                           | 39                               | 1.29         | 20.8            |
|                                           | 40                               | 0.86         | 12.2            |

Table S5. Overview of the specificity-conferring codes and the predicted and observed specificities of the adenylation domains from the Zmn16-17 NRPS from *S. plymuthica* RVH1 and the FcII-FcIJ NRPS from *Xenorhabdus szentirmaii*.<sup>5,13</sup> Predictions were made using NRPSpredictor2.<sup>14</sup>

|               | Adenylation domain | Specificity-conferring code | Predicted specificity     | Observed specificity |
|---------------|--------------------|-----------------------------|---------------------------|----------------------|
| Zmn16-17 NRPS | A1                 | DPRHLALLAK                  | hydrophobic-aliphatic     | γ-Asp                |
|               | A2                 | DTWTIASVSK                  | hydrophobic-aromatic, Phe | His                  |
|               | A3                 | DATKVGEVGK                  | Asn                       | Asn                  |
|               | A4                 | DATKVGEVGK                  | Asn                       | Asn                  |
|               | A5                 | DFWNIGMVHK                  | Thr                       | Thr                  |
|               | A6                 | DALFIGGTFK                  | Val                       | Val                  |
| FcII-J NRPS   | A1                 | DPRHVSLLLAK                 | hydrophobic-aliphatic     | γ-Asp                |
|               | A2                 | DVWTMSAVGK                  | Phe                       | His                  |
|               | A3                 | DATKVGEVGK                  | Asn                       | Asn                  |
|               | A4                 | DATKVGEVGK                  | Asn                       | Asn                  |
|               | A5                 | DFWNIGMVHK                  | Thr                       | Thr                  |
|               | A6                 | DALFIGGTFK                  | Val                       | Val                  |

Table S6. Overview of bacterial strains and plasmids used or constructed in this study.

| Strain or plasmid                        | Relevant Genotype or Description                                                                                                                                                                                      | Source or reference |
|------------------------------------------|-----------------------------------------------------------------------------------------------------------------------------------------------------------------------------------------------------------------------|---------------------|
| <i>Escherichia coli</i> TOP10            | F <sup>-</sup> <i>mcrA</i> Δ( <i>mrr-hsdRMS-mcrBC</i> ) Φ80 <i>lacZ</i> Δ <i>M15</i> Δ <i>lacX74</i> <i>recA1</i> <i>araD139</i> Δ( <i>ara leu</i> )7697 <i>galU</i> <i>galk</i> <i>rpsL</i> <i>endA1</i> <i>nupG</i> | Life Technologies   |
| <i>Escherichia coli</i> BL21 (DE3) pLysS | F <sup>-</sup> <i>ompT</i> <i>hsdSB</i> (rB <sup>-</sup> , mB <sup>-</sup> ) <i>gal</i> <i>dcm</i> (DE3) pLysS (CamR)                                                                                                 | Life Technologies   |
| <i>Escherichia coli</i> S17-1            | <i>recA</i> , <i>thi</i> , <i>pro</i> , <i>hsdR</i> M <sup>+</sup> RP4: 2-Tc::Mu- Km::Tn7 λpir, Sm <sup>R</sup> , Tp <sup>R</sup>                                                                                     | <sup>15</sup>       |
| <i>Escherichia coli</i> MG1655           | Wild type                                                                                                                                                                                                             | Lab collection      |
| <i>Staphylococcus aureus</i> ATCC27661   | Wild type                                                                                                                                                                                                             | Lab collection      |
| <i>Serratia plymuthica</i> RVH1          | Wild type                                                                                                                                                                                                             | <sup>1</sup>        |
| pSF100                                   | 4955 bp, <i>oriR6K</i> , Ap <sup>R</sup> , Km <sup>R</sup>                                                                                                                                                            | <sup>2</sup>        |
| pSFzmn10                                 | pSF100 + <i>Kpn</i> I- <i>Eco</i> RI PCR fragment (Δ6741 bp in <i>zmn10</i> )                                                                                                                                         | This study          |
| pSFzmn11                                 | pSF100 + <i>Kpn</i> I- <i>Eco</i> RI PCR fragment (Δ4242 bp in <i>zmn11</i> )                                                                                                                                         | This study          |
| pSFzmn12                                 | pSF100 + <i>Kpn</i> I- <i>Eco</i> RI PCR fragment (Δ3000 bp in <i>zmn12</i> )                                                                                                                                         | This study          |
| pSFzmn13                                 | pSF100 + <i>Kpn</i> I- <i>Eco</i> RI PCR fragment (Δ720 bp in <i>zmn13</i> )                                                                                                                                          | This study          |
| pSFzmn14                                 | pSF100 + <i>Kpn</i> I- <i>Eco</i> RI PCR fragment (Δ1185 bp in <i>zmn14</i> )                                                                                                                                         | This study          |
| pSFzmn15                                 | pSF100 + <i>Kpn</i> I- <i>Eco</i> RI PCR fragment (Δ774 bp in <i>zmn15</i> )                                                                                                                                          | This study          |
| pSFzmn16                                 | pSF100 + <i>Kpn</i> I- <i>Eco</i> RI PCR fragment (Δ12432 bp in <i>zmn16</i> )                                                                                                                                        | This study          |
| pSFzmn17                                 | pSF100 + <i>Kpn</i> I- <i>Eco</i> RI PCR fragment (Δ6474 bp in <i>zmn17</i> )                                                                                                                                         | This study          |
| pSFzmn18                                 | pSF100 + <i>Kpn</i> I- <i>Eco</i> RI PCR fragment (Δ4380 bp in <i>zmn18</i> )                                                                                                                                         | This study          |
| pSFzmn19                                 | pSF100 + <i>Kpn</i> I- <i>Eco</i> RI PCR fragment (Δ1188 bp in <i>zmn19</i> )                                                                                                                                         | This study          |
| pSFzmn22                                 | pSF100 + <i>Kpn</i> I- <i>Eco</i> RI PCR fragment (Δ1032 bp in <i>zmn22</i> )                                                                                                                                         | This study          |
| pTrc99A                                  | 4176 bp, <i>Ptrc</i> , <i>lacl<sup>q</sup></i> , <i>pBR322</i> ori, Ap <sup>R</sup>                                                                                                                                   | <sup>3</sup>        |
| pTrczmn13                                | pTrc99A + <i>zmn13</i> coding sequence                                                                                                                                                                                | This study          |
| pTrczmn14                                | pTrc99A + <i>zmn14</i> coding sequence                                                                                                                                                                                | This study          |
| pTrczmn15                                | pTrc99A + <i>zmn15</i> coding sequence                                                                                                                                                                                | This study          |
| pTrczmn19                                | pTrc99A + <i>zmn19</i> coding sequence                                                                                                                                                                                | This study          |
| pTrczmn22                                | pTrc99A + <i>zmn22</i> coding sequence                                                                                                                                                                                | This study          |

## SUPPLEMENTARY REFERENCES

1. R. Van Houdt, P. Moons, A. Jansen, K. Vanoirbeek and C. W. Michiels, *FEMS Microbiol. Lett.*, 2005, **246**, 265-272.
2. X. Rubires, F. Saigi, N. Pique, N. Climent, S. Merino, S. Alberti, J. M. Thomas and M. Regue, *J. Bacteriol.*, 1997, **179**, 7581-7586.
3. E. Amann, B. Ochs and K. Abel, *Gene*, 1988, **69**, 301-315.
4. J. Wu, H. B. Zhang, J. L. Xu, R. J. Cox, T. J. Simpson and L. H. Zhang, *Chem. Commun.*, 2010, **46**, 333-335.
5. J. Masschelein, W. Mattheus, L.-J. Gao, P. Moons, R. Van Houdt, B. Uytterhoeven, C. Lamberigts, E. Lesclinier, J. Rozenski, P. Herdewijn, A. Aertsen, C. Michiels and R. Lavigne, *PLoS One*, 2013, **8**, e54143.
6. J. L. Markley, A. Bax, Y. Arata, C. W. Hilbers, R. Kaptein, B. D. Sykes, P. E. Wright and K. Wüthrich, *Pure Appl. Chem.*, 1998, **70**, 117-142.
7. M. Sattler, J. Schwendinger, C. Schleucher and J. Griesinger, *J. Biomol. NMR.*, 1995, **6**, 11-22.
8. A. L. Davis, J. Keeler, D. Laue and J. Moskau, *J. Magn. Reson.*, 1992, **98**, 207-216.
9. C. Griesinger, G. Otting, K. Wüthrich and R. R. Emst, *J. Am. Chem. Soc.*, 1988, **110**, 7870-7872.
10. A. J. Shaka, P. B. Barker and R. Freeman, *J. Magn. Reson.*, 1985, **64**, 547-552.
11. J. Ruiz-Cabello, G. W. Vuister, C. T. W. Moonen, P. Van Gelderen, J. S. Cohen and P. C. M. Van Zijl, *J. Magn. Reson.*, 1992, **100**, 282-302.
12. A. Chhabra, A. S. Haque, R. K. Pal, A. Goyal, R. Rai, S. Joshi, S. Panjekar, S. Pasha, R. Sankaranarayanan and R. S. Gokhale, *Proc. Natl. Acad. Sci. U S A.*, 2012, **109**, 5681-5686.
13. S. W. Fuchs, F. Grundmann, M. Kurz, M. Kaiser and H. B. Bode, *Chembiochem*, 2014, **15**, 512-516.
14. M. Röttig, M. H. Medema, K. Blin, T. Weber, C. Rausch and O. Kohlbacher, *Nucleic Acids Res.*, 2011, **39**, W362-W367.
15. R. Simon, U. Priefer and A. Pühler, *Nat. Biotechnol.*, 1983, **1**, 784-791.
